# Supplementary material for: The Effects of Cathepsin B Inhibition in the Face of Diffuse Traumatic Brain Injury and Secondary Intracranial Pressure Elevation
Source: Preprints.org preprint supplement (doi:10.20944/preprints202405.1740.v1), 2024-05-27
Supplement: Supplementary file 1 [file supplementary]

## Sheet: Sheet1
Supplemental Table 3. Full data set for all data presented in figure 10.
Figure 10 individual cell data	Animal ID	Image number	Disruption Status	Infusion	Injury group	Cath-B localization
	21822	1	membrane disrupted	10% DMSO	sham	diffuse
	21822	1	non-disrupted	10% DMSO	sham	punctate
	21822	1	non-disrupted	10% DMSO	sham	punctate
	21822	1	non-disrupted	10% DMSO	sham	punctate
	21822	1	non-disrupted	10% DMSO	sham	punctate
	21822	1	non-disrupted	10% DMSO	sham	punctate
	21822	1	non-disrupted	10% DMSO	sham	punctate
	21822	1	non-disrupted	10% DMSO	sham	punctate
	21822	1	non-disrupted	10% DMSO	sham	punctate
	21822	1	non-disrupted	10% DMSO	sham	diffuse
	21822	1	non-disrupted	10% DMSO	sham	diffuse
	21822	2	non-disrupted	10% DMSO	sham	punctate
	21822	2	non-disrupted	10% DMSO	sham	punctate
	21822	2	non-disrupted	10% DMSO	sham	punctate
	21822	2	non-disrupted	10% DMSO	sham	punctate
	21822	2	non-disrupted	10% DMSO	sham	punctate
	21822	2	non-disrupted	10% DMSO	sham	punctate
	21822	2	non-disrupted	10% DMSO	sham	punctate
	21822	2	non-disrupted	10% DMSO	sham	punctate
	21822	2	non-disrupted	10% DMSO	sham	punctate
	21822	2	non-disrupted	10% DMSO	sham	punctate
	21822	3	membrane disrupted	10% DMSO	sham	punctate
	21822	3	membrane disrupted	10% DMSO	sham	punctate
	21822	3	membrane disrupted	10% DMSO	sham	diffuse
	21822	3	membrane disrupted	10% DMSO	sham	diffuse
	21822	3	membrane disrupted	10% DMSO	sham	diffuse
	21822	3	non-disrupted	10% DMSO	sham	punctate
	21822	3	non-disrupted	10% DMSO	sham	punctate
	21822	3	non-disrupted	10% DMSO	sham	punctate
	21822	3	non-disrupted	10% DMSO	sham	punctate
	21822	3	non-disrupted	10% DMSO	sham	diffuse
	21822	3	non-disrupted	10% DMSO	sham	diffuse
	21822	4	membrane disrupted	10% DMSO	sham	punctate
	21822	4	membrane disrupted	10% DMSO	sham	punctate
	21822	4	membrane disrupted	10% DMSO	sham	diffuse
	21822	4	membrane disrupted	10% DMSO	sham	diffuse
	21822	4	membrane disrupted	10% DMSO	sham	diffuse
	21822	4	membrane disrupted	10% DMSO	sham	diffuse
	21822	4	membrane disrupted	10% DMSO	sham	diffuse
	21822	4	membrane disrupted	10% DMSO	sham	diffuse
	21822	4	non-disrupted	10% DMSO	sham	diffuse
	21822	5	membrane disrupted	10% DMSO	sham	punctate
	21822	5	membrane disrupted	10% DMSO	sham	punctate
	21822	5	membrane disrupted	10% DMSO	sham	punctate
	21822	5	membrane disrupted	10% DMSO	sham	punctate
	21822	5	membrane disrupted	10% DMSO	sham	punctate
	21822	5	membrane disrupted	10% DMSO	sham	punctate
	21822	5	membrane disrupted	10% DMSO	sham	punctate
	21822	5	membrane disrupted	10% DMSO	sham	punctate
	21822	5	membrane disrupted	10% DMSO	sham	punctate
	21822	5	membrane disrupted	10% DMSO	sham	punctate
	31721	1	membrane disrupted	10% DMSO	sham	punctate
	31721	1	membrane disrupted	10% DMSO	sham	punctate
	31721	1	membrane disrupted	10% DMSO	sham	punctate
	31721	1	membrane disrupted	10% DMSO	sham	punctate
	31721	1	membrane disrupted	10% DMSO	sham	punctate
	31721	1	non-disrupted	10% DMSO	sham	punctate
	31721	1	non-disrupted	10% DMSO	sham	punctate
	31721	1	non-disrupted	10% DMSO	sham	punctate
	31721	1	non-disrupted	10% DMSO	sham	diffuse
	31721	1	non-disrupted	10% DMSO	sham	diffuse
	31721	1	non-disrupted	10% DMSO	sham	diffuse
	31721	1	non-disrupted	10% DMSO	sham	diffuse
	31721	1	non-disrupted	10% DMSO	sham	diffuse
	31721	1	non-disrupted	10% DMSO	sham	diffuse
	31721	1	non-disrupted	10% DMSO	sham	diffuse
	31721	2	membrane disrupted	10% DMSO	sham	punctate
	31721	2	membrane disrupted	10% DMSO	sham	punctate
	31721	2	membrane disrupted	10% DMSO	sham	punctate
	31721	2	membrane disrupted	10% DMSO	sham	diffuse
	31721	2	non-disrupted	10% DMSO	sham	punctate
	31721	2	non-disrupted	10% DMSO	sham	punctate
	31721	2	non-disrupted	10% DMSO	sham	punctate
	31721	2	non-disrupted	10% DMSO	sham	diffuse
	31721	2	non-disrupted	10% DMSO	sham	diffuse
	31721	2	non-disrupted	10% DMSO	sham	diffuse
	31721	2	non-disrupted	10% DMSO	sham	diffuse
	31721	2	non-disrupted	10% DMSO	sham	diffuse
	31721	2	non-disrupted	10% DMSO	sham	diffuse
	31721	2	non-disrupted	10% DMSO	sham	diffuse
	31721	3	membrane disrupted	10% DMSO	sham	punctate
	31721	3	membrane disrupted	10% DMSO	sham	punctate
	31721	3	membrane disrupted	10% DMSO	sham	punctate
	31721	3	membrane disrupted	10% DMSO	sham	diffuse
	31721	3	membrane disrupted	10% DMSO	sham	diffuse
	31721	3	non-disrupted	10% DMSO	sham	punctate
	31721	3	non-disrupted	10% DMSO	sham	punctate
	31721	3	non-disrupted	10% DMSO	sham	punctate
	31721	3	non-disrupted	10% DMSO	sham	punctate
	31721	3	non-disrupted	10% DMSO	sham	diffuse
	31721	3	non-disrupted	10% DMSO	sham	diffuse
	31721	3	non-disrupted	10% DMSO	sham	diffuse
	31721	3	non-disrupted	10% DMSO	sham	diffuse
	31721	3	non-disrupted	10% DMSO	sham	diffuse
	31721	3	non-disrupted	10% DMSO	sham	diffuse
	31721	4	membrane disrupted	10% DMSO	sham	punctate
	31721	4	membrane disrupted	10% DMSO	sham	punctate
	31721	4	membrane disrupted	10% DMSO	sham	diffuse
	31721	4	membrane disrupted	10% DMSO	sham	diffuse
	31721	4	membrane disrupted	10% DMSO	sham	diffuse
	31721	4	non-disrupted	10% DMSO	sham	punctate
	31721	4	non-disrupted	10% DMSO	sham	punctate
	31721	4	non-disrupted	10% DMSO	sham	punctate
	31721	4	non-disrupted	10% DMSO	sham	punctate
	31721	4	non-disrupted	10% DMSO	sham	punctate
	31721	4	non-disrupted	10% DMSO	sham	punctate
	31721	4	non-disrupted	10% DMSO	sham	punctate
	31721	4	non-disrupted	10% DMSO	sham	punctate
	31721	4	non-disrupted	10% DMSO	sham	diffuse
	31721	4	non-disrupted	10% DMSO	sham	diffuse
	31721	5	membrane disrupted	10% DMSO	sham	punctate
	31721	5	membrane disrupted	10% DMSO	sham	punctate
	31721	5	membrane disrupted	10% DMSO	sham	punctate
	31721	5	membrane disrupted	10% DMSO	sham	punctate
	31721	5	membrane disrupted	10% DMSO	sham	punctate
	31721	5	membrane disrupted	10% DMSO	sham	punctate
	31721	5	membrane disrupted	10% DMSO	sham	punctate
	31721	5	membrane disrupted	10% DMSO	sham	punctate
	31721	5	membrane disrupted	10% DMSO	sham	punctate
	31721	5	membrane disrupted	10% DMSO	sham	punctate
	31721	5	non-disrupted	10% DMSO	sham	punctate
	31721	5	non-disrupted	10% DMSO	sham	punctate
	31721	5	non-disrupted	10% DMSO	sham	punctate
	31721	5	non-disrupted	10% DMSO	sham	punctate
	31721	5	non-disrupted	10% DMSO	sham	punctate
	31721	5	non-disrupted	10% DMSO	sham	punctate
	31721	5	non-disrupted	10% DMSO	sham	punctate
	31721	5	non-disrupted	10% DMSO	sham	punctate
	051721B	1	membrane disrupted	10% DMSO	sham	punctate
	051721B	1	membrane disrupted	10% DMSO	sham	punctate
	051721B	1	membrane disrupted	10% DMSO	sham	punctate
	051721B	1	membrane disrupted	10% DMSO	sham	punctate
	051721B	1	membrane disrupted	10% DMSO	sham	punctate
	051721B	1	membrane disrupted	10% DMSO	sham	punctate
	051721B	1	membrane disrupted	10% DMSO	sham	punctate
	051721B	1	membrane disrupted	10% DMSO	sham	diffuse
	051721B	1	membrane disrupted	10% DMSO	sham	diffuse
	051721B	1	membrane disrupted	10% DMSO	sham	diffuse
	051721B	1	non-disrupted	10% DMSO	sham	punctate
	051721B	1	non-disrupted	10% DMSO	sham	punctate
	051721B	1	non-disrupted	10% DMSO	sham	diffuse
	051721B	1	non-disrupted	10% DMSO	sham	diffuse
	051721B	1	non-disrupted	10% DMSO	sham	diffuse
	051721B	1	non-disrupted	10% DMSO	sham	diffuse
	051721B	1	non-disrupted	10% DMSO	sham	diffuse
	051721B	1	non-disrupted	10% DMSO	sham	diffuse
	051721B	1	non-disrupted	10% DMSO	sham	diffuse
	051721B	1	non-disrupted	10% DMSO	sham	diffuse
	051721B	2	non-disrupted	10% DMSO	sham	punctate
	051721B	2	non-disrupted	10% DMSO	sham	punctate
	051721B	2	non-disrupted	10% DMSO	sham	punctate
	051721B	2	non-disrupted	10% DMSO	sham	punctate
	051721B	2	non-disrupted	10% DMSO	sham	punctate
	051721B	2	non-disrupted	10% DMSO	sham	diffuse
	051721B	3	membrane disrupted	10% DMSO	sham	punctate
	051721B	3	membrane disrupted	10% DMSO	sham	punctate
	051721B	3	membrane disrupted	10% DMSO	sham	punctate
	051721B	3	membrane disrupted	10% DMSO	sham	punctate
	051721B	3	membrane disrupted	10% DMSO	sham	diffuse
	051721B	3	membrane disrupted	10% DMSO	sham	diffuse
	051721B	3	membrane disrupted	10% DMSO	sham	diffuse
	051721B	3	non-disrupted	10% DMSO	sham	punctate
	051721B	3	non-disrupted	10% DMSO	sham	diffuse
	051721B	3	non-disrupted	10% DMSO	sham	diffuse
	051721B	3	non-disrupted	10% DMSO	sham	diffuse
	051721B	3	non-disrupted	10% DMSO	sham	diffuse
	051721B	3	non-disrupted	10% DMSO	sham	diffuse
	051721B	4	membrane disrupted	10% DMSO	sham	punctate
	051721B	4	membrane disrupted	10% DMSO	sham	punctate
	051721B	4	membrane disrupted	10% DMSO	sham	punctate
	051721B	4	membrane disrupted	10% DMSO	sham	punctate
	051721B	4	membrane disrupted	10% DMSO	sham	punctate
	051721B	4	membrane disrupted	10% DMSO	sham	punctate
	051721B	4	membrane disrupted	10% DMSO	sham	diffuse
	051721B	4	membrane disrupted	10% DMSO	sham	diffuse
	051721B	4	membrane disrupted	10% DMSO	sham	diffuse
	051721B	4	membrane disrupted	10% DMSO	sham	diffuse
	051721B	4	non-disrupted	10% DMSO	sham	punctate
	051721B	4	non-disrupted	10% DMSO	sham	punctate
	051721B	4	non-disrupted	10% DMSO	sham	punctate
	051721B	4	non-disrupted	10% DMSO	sham	punctate
	051721B	4	non-disrupted	10% DMSO	sham	diffuse
	051721B	4	non-disrupted	10% DMSO	sham	diffuse
	051721B	4	non-disrupted	10% DMSO	sham	diffuse
	051721B	4	non-disrupted	10% DMSO	sham	diffuse
	051721B	4	non-disrupted	10% DMSO	sham	diffuse
	051721B	4	non-disrupted	10% DMSO	sham	diffuse
	051721B	5	membrane disrupted	10% DMSO	sham	punctate
	051721B	5	membrane disrupted	10% DMSO	sham	punctate
	051721B	5	membrane disrupted	10% DMSO	sham	punctate
	051721B	5	membrane disrupted	10% DMSO	sham	punctate
	051721B	5	membrane disrupted	10% DMSO	sham	punctate
	051721B	5	membrane disrupted	10% DMSO	sham	punctate
	051721B	5	membrane disrupted	10% DMSO	sham	punctate
	051721B	5	membrane disrupted	10% DMSO	sham	punctate
	051721B	5	membrane disrupted	10% DMSO	sham	punctate
	051721B	5	non-disrupted	10% DMSO	sham	punctate
	051721B	5	non-disrupted	10% DMSO	sham	punctate
	051721B	5	non-disrupted	10% DMSO	sham	punctate
	051721B	5	non-disrupted	10% DMSO	sham	punctate
	051721B	5	non-disrupted	10% DMSO	sham	punctate
	051721B	5	non-disrupted	10% DMSO	sham	diffuse
	051721B	5	non-disrupted	10% DMSO	sham	diffuse
	93021	1	membrane disrupted	10% DMSO	sham	diffuse
	93021	1	membrane disrupted	10% DMSO	sham	diffuse
	93021	1	membrane disrupted	10% DMSO	sham	diffuse
	93021	1	membrane disrupted	10% DMSO	sham	diffuse
	93021	1	membrane disrupted	10% DMSO	sham	diffuse
	93021	1	membrane disrupted	10% DMSO	sham	diffuse
	93021	1	membrane disrupted	10% DMSO	sham	diffuse
	93021	1	membrane disrupted	10% DMSO	sham	diffuse
	93021	1	membrane disrupted	10% DMSO	sham	diffuse
	93021	1	membrane disrupted	10% DMSO	sham	diffuse
	93021	1	non-disrupted	10% DMSO	sham	punctate
	93021	1	non-disrupted	10% DMSO	sham	punctate
	93021	1	non-disrupted	10% DMSO	sham	punctate
	93021	1	non-disrupted	10% DMSO	sham	punctate
	93021	1	non-disrupted	10% DMSO	sham	punctate
	93021	1	non-disrupted	10% DMSO	sham	punctate
	93021	1	non-disrupted	10% DMSO	sham	punctate
	93021	1	non-disrupted	10% DMSO	sham	punctate
	93021	1	non-disrupted	10% DMSO	sham	punctate
	93021	1	non-disrupted	10% DMSO	sham	punctate
	93021	2	membrane disrupted	10% DMSO	sham	diffuse
	93021	2	membrane disrupted	10% DMSO	sham	diffuse
	93021	2	membrane disrupted	10% DMSO	sham	diffuse
	93021	2	membrane disrupted	10% DMSO	sham	diffuse
	93021	2	membrane disrupted	10% DMSO	sham	diffuse
	93021	2	membrane disrupted	10% DMSO	sham	diffuse
	93021	2	membrane disrupted	10% DMSO	sham	diffuse
	93021	2	membrane disrupted	10% DMSO	sham	diffuse
	93021	2	membrane disrupted	10% DMSO	sham	diffuse
	93021	2	membrane disrupted	10% DMSO	sham	diffuse
	93021	2	non-disrupted	10% DMSO	sham	punctate
	93021	2	non-disrupted	10% DMSO	sham	punctate
	93021	2	non-disrupted	10% DMSO	sham	punctate
	93021	2	non-disrupted	10% DMSO	sham	punctate
	93021	2	non-disrupted	10% DMSO	sham	punctate
	93021	2	non-disrupted	10% DMSO	sham	punctate
	93021	2	non-disrupted	10% DMSO	sham	punctate
	93021	2	non-disrupted	10% DMSO	sham	diffuse
	93021	2	non-disrupted	10% DMSO	sham	diffuse
	93021	2	non-disrupted	10% DMSO	sham	diffuse
	93021	3	membrane disrupted	10% DMSO	sham	diffuse
	93021	3	membrane disrupted	10% DMSO	sham	diffuse
	93021	3	membrane disrupted	10% DMSO	sham	diffuse
	93021	3	membrane disrupted	10% DMSO	sham	diffuse
	93021	3	membrane disrupted	10% DMSO	sham	diffuse
	93021	3	membrane disrupted	10% DMSO	sham	diffuse
	93021	3	membrane disrupted	10% DMSO	sham	diffuse
	93021	3	membrane disrupted	10% DMSO	sham	diffuse
	93021	3	membrane disrupted	10% DMSO	sham	diffuse
	93021	3	membrane disrupted	10% DMSO	sham	diffuse
	93021	3	non-disrupted	10% DMSO	sham	punctate
	93021	3	non-disrupted	10% DMSO	sham	punctate
	93021	3	non-disrupted	10% DMSO	sham	punctate
	93021	3	non-disrupted	10% DMSO	sham	punctate
	93021	3	non-disrupted	10% DMSO	sham	punctate
	93021	3	non-disrupted	10% DMSO	sham	diffuse
	93021	3	non-disrupted	10% DMSO	sham	diffuse
	93021	3	non-disrupted	10% DMSO	sham	diffuse
	93021	3	non-disrupted	10% DMSO	sham	diffuse
	93021	3	non-disrupted	10% DMSO	sham	diffuse
	93021	4	membrane disrupted	10% DMSO	sham	punctate
	93021	4	membrane disrupted	10% DMSO	sham	diffuse
	93021	4	membrane disrupted	10% DMSO	sham	diffuse
	93021	4	membrane disrupted	10% DMSO	sham	diffuse
	93021	4	membrane disrupted	10% DMSO	sham	diffuse
	93021	4	membrane disrupted	10% DMSO	sham	diffuse
	93021	4	membrane disrupted	10% DMSO	sham	diffuse
	93021	4	membrane disrupted	10% DMSO	sham	diffuse
	93021	4	membrane disrupted	10% DMSO	sham	diffuse
	93021	4	membrane disrupted	10% DMSO	sham	diffuse
	93021	4	non-disrupted	10% DMSO	sham	punctate
	93021	4	non-disrupted	10% DMSO	sham	punctate
	93021	4	non-disrupted	10% DMSO	sham	punctate
	93021	4	non-disrupted	10% DMSO	sham	punctate
	93021	4	non-disrupted	10% DMSO	sham	punctate
	93021	4	non-disrupted	10% DMSO	sham	punctate
	93021	4	non-disrupted	10% DMSO	sham	punctate
	93021	4	non-disrupted	10% DMSO	sham	punctate
	93021	4	non-disrupted	10% DMSO	sham	punctate
	93021	4	non-disrupted	10% DMSO	sham	punctate
	93021	5	membrane disrupted	10% DMSO	sham	punctate
	93021	5	membrane disrupted	10% DMSO	sham	punctate
	93021	5	membrane disrupted	10% DMSO	sham	diffuse
	93021	5	membrane disrupted	10% DMSO	sham	diffuse
	93021	5	membrane disrupted	10% DMSO	sham	diffuse
	93021	5	membrane disrupted	10% DMSO	sham	diffuse
	93021	5	membrane disrupted	10% DMSO	sham	diffuse
	93021	5	membrane disrupted	10% DMSO	sham	diffuse
	93021	5	membrane disrupted	10% DMSO	sham	diffuse
	93021	5	membrane disrupted	10% DMSO	sham	diffuse
	93021	5	non-disrupted	10% DMSO	sham	punctate
	93021	5	non-disrupted	10% DMSO	sham	punctate
	93021	5	non-disrupted	10% DMSO	sham	punctate
	93021	5	non-disrupted	10% DMSO	sham	punctate
	93021	5	non-disrupted	10% DMSO	sham	punctate
	93021	5	non-disrupted	10% DMSO	sham	punctate
	93021	5	non-disrupted	10% DMSO	sham	punctate
	93021	5	non-disrupted	10% DMSO	sham	punctate
	93021	5	non-disrupted	10% DMSO	sham	diffuse
	41722	1	membrane disrupted	10% DMSO	sham	diffuse
	41722	1	membrane disrupted	10% DMSO	sham	diffuse
	41722	1	membrane disrupted	10% DMSO	sham	diffuse
	41722	1	non-disrupted	10% DMSO	sham	punctate
	41722	1	non-disrupted	10% DMSO	sham	punctate
	41722	1	non-disrupted	10% DMSO	sham	punctate
	41722	1	non-disrupted	10% DMSO	sham	punctate
	41722	1	non-disrupted	10% DMSO	sham	punctate
	41722	1	non-disrupted	10% DMSO	sham	punctate
	41722	1	non-disrupted	10% DMSO	sham	punctate
	41722	1	non-disrupted	10% DMSO	sham	punctate
	41722	1	non-disrupted	10% DMSO	sham	diffuse
	41722	1	non-disrupted	10% DMSO	sham	diffuse
	41722	2	membrane disrupted	10% DMSO	sham	diffuse
	41722	2	membrane disrupted	10% DMSO	sham	diffuse
	41722	2	membrane disrupted	10% DMSO	sham	diffuse
	41722	2	non-disrupted	10% DMSO	sham	punctate
	41722	2	non-disrupted	10% DMSO	sham	punctate
	41722	2	non-disrupted	10% DMSO	sham	punctate
	41722	2	non-disrupted	10% DMSO	sham	punctate
	41722	2	non-disrupted	10% DMSO	sham	diffuse
	41722	2	non-disrupted	10% DMSO	sham	diffuse
	41722	2	non-disrupted	10% DMSO	sham	diffuse
	41722	2	non-disrupted	10% DMSO	sham	diffuse
	41722	2	non-disrupted	10% DMSO	sham	diffuse
	41722	2	non-disrupted	10% DMSO	sham	diffuse
	41722	3	non-disrupted	10% DMSO	sham	punctate
	41722	3	non-disrupted	10% DMSO	sham	punctate
	41722	3	non-disrupted	10% DMSO	sham	punctate
	41722	3	non-disrupted	10% DMSO	sham	punctate
	41722	3	non-disrupted	10% DMSO	sham	punctate
	41722	3	non-disrupted	10% DMSO	sham	punctate
	41722	3	non-disrupted	10% DMSO	sham	punctate
	41722	3	non-disrupted	10% DMSO	sham	punctate
	41722	3	non-disrupted	10% DMSO	sham	diffuse
	41722	3	non-disrupted	10% DMSO	sham	diffuse
	41722	4	membrane disrupted	10% DMSO	sham	punctate
	41722	4	membrane disrupted	10% DMSO	sham	punctate
	41722	4	membrane disrupted	10% DMSO	sham	punctate
	41722	4	membrane disrupted	10% DMSO	sham	punctate
	41722	4	membrane disrupted	10% DMSO	sham	punctate
	41722	4	membrane disrupted	10% DMSO	sham	diffuse
	41722	4	membrane disrupted	10% DMSO	sham	diffuse
	41722	4	membrane disrupted	10% DMSO	sham	diffuse
	41722	4	membrane disrupted	10% DMSO	sham	diffuse
	41722	4	membrane disrupted	10% DMSO	sham	diffuse
	41722	4	non-disrupted	10% DMSO	sham	punctate
	41722	4	non-disrupted	10% DMSO	sham	punctate
	41722	4	non-disrupted	10% DMSO	sham	punctate
	41722	4	non-disrupted	10% DMSO	sham	punctate
	41722	4	non-disrupted	10% DMSO	sham	punctate
	41722	4	non-disrupted	10% DMSO	sham	diffuse
	41722	4	non-disrupted	10% DMSO	sham	diffuse
	41722	4	non-disrupted	10% DMSO	sham	diffuse
	41722	4	non-disrupted	10% DMSO	sham	diffuse
	41722	4	non-disrupted	10% DMSO	sham	diffuse
	41722	5	membrane disrupted	10% DMSO	sham	punctate
	41722	5	membrane disrupted	10% DMSO	sham	punctate
	41722	5	membrane disrupted	10% DMSO	sham	punctate
	41722	5	membrane disrupted	10% DMSO	sham	diffuse
	41722	5	non-disrupted	10% DMSO	sham	punctate
	41722	5	non-disrupted	10% DMSO	sham	punctate
	41722	5	non-disrupted	10% DMSO	sham	punctate
	41722	5	non-disrupted	10% DMSO	sham	punctate
	41722	5	non-disrupted	10% DMSO	sham	diffuse
	41722	5	non-disrupted	10% DMSO	sham	diffuse
	41722	5	non-disrupted	10% DMSO	sham	diffuse
	41722	5	non-disrupted	10% DMSO	sham	diffuse
	41722	5	non-disrupted	10% DMSO	sham	diffuse
	41722	5	non-disrupted	10% DMSO	sham	diffuse
	41522	1	membrane disrupted	CA074Me	sham	diffuse
	41522	1	membrane disrupted	CA074Me	sham	diffuse
	41522	1	non-disrupted	CA074Me	sham	punctate
	41522	1	non-disrupted	CA074Me	sham	punctate
	41522	1	non-disrupted	CA074Me	sham	punctate
	41522	1	non-disrupted	CA074Me	sham	punctate
	41522	1	non-disrupted	CA074Me	sham	punctate
	41522	1	non-disrupted	CA074Me	sham	punctate
	41522	1	non-disrupted	CA074Me	sham	diffuse
	41522	1	non-disrupted	CA074Me	sham	diffuse
	41522	1	non-disrupted	CA074Me	sham	diffuse
	41522	1	non-disrupted	CA074Me	sham	diffuse
	41522	2	membrane disrupted	CA074Me	sham	diffuse
	41522	2	membrane disrupted	CA074Me	sham	diffuse
	41522	2	membrane disrupted	CA074Me	sham	diffuse
	41522	2	membrane disrupted	CA074Me	sham	diffuse
	41522	2	membrane disrupted	CA074Me	sham	diffuse
	41522	2	non-disrupted	CA074Me	sham	punctate
	41522	2	non-disrupted	CA074Me	sham	punctate
	41522	2	non-disrupted	CA074Me	sham	punctate
	41522	2	non-disrupted	CA074Me	sham	punctate
	41522	2	non-disrupted	CA074Me	sham	punctate
	41522	2	non-disrupted	CA074Me	sham	punctate
	41522	2	non-disrupted	CA074Me	sham	diffuse
	41522	2	non-disrupted	CA074Me	sham	diffuse
	41522	2	non-disrupted	CA074Me	sham	diffuse
	41522	2	non-disrupted	CA074Me	sham	diffuse
	41522	3	membrane disrupted	CA074Me	sham	diffuse
	41522	3	membrane disrupted	CA074Me	sham	diffuse
	41522	3	membrane disrupted	CA074Me	sham	diffuse
	41522	3	membrane disrupted	CA074Me	sham	diffuse
	41522	3	membrane disrupted	CA074Me	sham	diffuse
	41522	3	membrane disrupted	CA074Me	sham	diffuse
	41522	3	membrane disrupted	CA074Me	sham	diffuse
	41522	3	membrane disrupted	CA074Me	sham	diffuse
	41522	3	membrane disrupted	CA074Me	sham	punctate
	41522	3	membrane disrupted	CA074Me	sham	punctate
	41522	3	non-disrupted	CA074Me	sham	punctate
	41522	3	non-disrupted	CA074Me	sham	punctate
	41522	3	non-disrupted	CA074Me	sham	punctate
	41522	3	non-disrupted	CA074Me	sham	punctate
	41522	3	non-disrupted	CA074Me	sham	punctate
	41522	3	non-disrupted	CA074Me	sham	punctate
	41522	3	non-disrupted	CA074Me	sham	punctate
	41522	3	non-disrupted	CA074Me	sham	diffuse
	41522	3	non-disrupted	CA074Me	sham	diffuse
	41522	3	non-disrupted	CA074Me	sham	diffuse
	41522	4	membrane disrupted	CA074Me	sham	punctate
	41522	4	membrane disrupted	CA074Me	sham	punctate
	41522	4	membrane disrupted	CA074Me	sham	punctate
	41522	4	membrane disrupted	CA074Me	sham	punctate
	41522	4	membrane disrupted	CA074Me	sham	punctate
	41522	4	membrane disrupted	CA074Me	sham	punctate
	41522	4	membrane disrupted	CA074Me	sham	punctate
	41522	4	membrane disrupted	CA074Me	sham	punctate
	41522	4	membrane disrupted	CA074Me	sham	punctate
	41522	4	membrane disrupted	CA074Me	sham	punctate
	41522	4	non-disrupted	CA074Me	sham	punctate
	41522	4	non-disrupted	CA074Me	sham	punctate
	41522	4	non-disrupted	CA074Me	sham	punctate
	41522	4	non-disrupted	CA074Me	sham	punctate
	41522	4	non-disrupted	CA074Me	sham	punctate
	41522	4	non-disrupted	CA074Me	sham	punctate
	41522	4	non-disrupted	CA074Me	sham	punctate
	41522	4	non-disrupted	CA074Me	sham	punctate
	41522	4	non-disrupted	CA074Me	sham	punctate
	41522	4	non-disrupted	CA074Me	sham	diffuse
	41522	5	membrane disrupted	CA074Me	sham	punctate
	41522	5	membrane disrupted	CA074Me	sham	punctate
	41522	5	membrane disrupted	CA074Me	sham	punctate
	41522	5	membrane disrupted	CA074Me	sham	punctate
	41522	5	membrane disrupted	CA074Me	sham	punctate
	41522	5	membrane disrupted	CA074Me	sham	punctate
	41522	5	membrane disrupted	CA074Me	sham	punctate
	41522	5	membrane disrupted	CA074Me	sham	punctate
	41522	5	membrane disrupted	CA074Me	sham	punctate
	41522	5	membrane disrupted	CA074Me	sham	punctate
	41522	5	non-disrupted	CA074Me	sham	punctate
	41522	5	non-disrupted	CA074Me	sham	punctate
	41522	5	non-disrupted	CA074Me	sham	punctate
	41522	5	non-disrupted	CA074Me	sham	punctate
	41522	5	non-disrupted	CA074Me	sham	punctate
	41522	5	non-disrupted	CA074Me	sham	punctate
	41522	5	non-disrupted	CA074Me	sham	punctate
	41522	5	non-disrupted	CA074Me	sham	punctate
	41522	5	non-disrupted	CA074Me	sham	punctate
	41522	5	non-disrupted	CA074Me	sham	diffuse
	100821	1	non-disrupted	CA074Me	sham	punctate
	100821	1	non-disrupted	CA074Me	sham	punctate
	100821	1	non-disrupted	CA074Me	sham	punctate
	100821	1	non-disrupted	CA074Me	sham	punctate
	100821	1	non-disrupted	CA074Me	sham	punctate
	100821	1	non-disrupted	CA074Me	sham	punctate
	100821	1	non-disrupted	CA074Me	sham	diffuse
	100821	1	non-disrupted	CA074Me	sham	diffuse
	100821	1	non-disrupted	CA074Me	sham	diffuse
	100821	3	membrane disrupted	CA074Me	sham	punctate
	100821	3	membrane disrupted	CA074Me	sham	punctate
	100821	3	membrane disrupted	CA074Me	sham	diffuse
	100821	3	membrane disrupted	CA074Me	sham	diffuse
	100821	3	membrane disrupted	CA074Me	sham	diffuse
	100821	3	membrane disrupted	CA074Me	sham	diffuse
	100821	3	membrane disrupted	CA074Me	sham	diffuse
	100821	3	membrane disrupted	CA074Me	sham	diffuse
	100821	3	membrane disrupted	CA074Me	sham	diffuse
	100821	3	membrane disrupted	CA074Me	sham	diffuse
	100821	4	membrane disrupted	CA074Me	sham	diffuse
	100821	4	membrane disrupted	CA074Me	sham	diffuse
	100821	4	membrane disrupted	CA074Me	sham	diffuse
	100821	4	membrane disrupted	CA074Me	sham	diffuse
	100821	4	membrane disrupted	CA074Me	sham	diffuse
	100821	4	membrane disrupted	CA074Me	sham	diffuse
	100821	4	membrane disrupted	CA074Me	sham	diffuse
	100821	4	membrane disrupted	CA074Me	sham	diffuse
	100821	4	membrane disrupted	CA074Me	sham	diffuse
	100821	4	membrane disrupted	CA074Me	sham	diffuse
	100821	4	non-disrupted	CA074Me	sham	diffuse
	100821	4	non-disrupted	CA074Me	sham	diffuse
	100821	5	membrane disrupted	CA074Me	sham	diffuse
	100821	5	membrane disrupted	CA074Me	sham	diffuse
	100821	5	membrane disrupted	CA074Me	sham	diffuse
	100821	5	membrane disrupted	CA074Me	sham	diffuse
	100821	5	membrane disrupted	CA074Me	sham	diffuse
	100821	5	membrane disrupted	CA074Me	sham	diffuse
	100821	5	membrane disrupted	CA074Me	sham	diffuse
	100821	5	membrane disrupted	CA074Me	sham	diffuse
	100821	5	membrane disrupted	CA074Me	sham	diffuse
	100821	5	membrane disrupted	CA074Me	sham	diffuse
	100821	5	non-disrupted	CA074Me	sham	punctate
	100821	5	non-disrupted	CA074Me	sham	punctate
	100821	5	non-disrupted	CA074Me	sham	punctate
	100821	5	non-disrupted	CA074Me	sham	punctate
	100821	5	non-disrupted	CA074Me	sham	punctate
	100821	5	non-disrupted	CA074Me	sham	punctate
	100821	5	non-disrupted	CA074Me	sham	punctate
	100821	5	non-disrupted	CA074Me	sham	punctate
	100821	5	non-disrupted	CA074Me	sham	punctate
	100821	5	non-disrupted	CA074Me	sham	diffuse
	72322	1	membrane disrupted	CA074Me	sham	diffuse
	72322	1	membrane disrupted	CA074Me	sham	diffuse
	72322	1	membrane disrupted	CA074Me	sham	diffuse
	72322	1	membrane disrupted	CA074Me	sham	diffuse
	72322	1	membrane disrupted	CA074Me	sham	diffuse
	72322	1	membrane disrupted	CA074Me	sham	diffuse
	72322	1	membrane disrupted	CA074Me	sham	diffuse
	72322	1	non-disrupted	CA074Me	sham	punctate
	72322	1	non-disrupted	CA074Me	sham	punctate
	72322	1	non-disrupted	CA074Me	sham	punctate
	72322	1	non-disrupted	CA074Me	sham	punctate
	72322	1	non-disrupted	CA074Me	sham	punctate
	72322	1	non-disrupted	CA074Me	sham	punctate
	72322	1	non-disrupted	CA074Me	sham	punctate
	72322	1	non-disrupted	CA074Me	sham	punctate
	72322	1	non-disrupted	CA074Me	sham	punctate
	72322	1	non-disrupted	CA074Me	sham	diffuse
	72322	2	membrane disrupted	CA074Me	sham	diffuse
	72322	2	membrane disrupted	CA074Me	sham	diffuse
	72322	2	membrane disrupted	CA074Me	sham	diffuse
	72322	2	membrane disrupted	CA074Me	sham	diffuse
	72322	2	membrane disrupted	CA074Me	sham	diffuse
	72322	2	non-disrupted	CA074Me	sham	punctate
	72322	2	non-disrupted	CA074Me	sham	punctate
	72322	2	non-disrupted	CA074Me	sham	punctate
	72322	2	non-disrupted	CA074Me	sham	punctate
	72322	2	non-disrupted	CA074Me	sham	punctate
	72322	2	non-disrupted	CA074Me	sham	diffuse
	72322	2	non-disrupted	CA074Me	sham	diffuse
	72322	2	non-disrupted	CA074Me	sham	diffuse
	72322	2	non-disrupted	CA074Me	sham	diffuse
	72322	2	non-disrupted	CA074Me	sham	diffuse
	72322	3	membrane disrupted	CA074Me	sham	punctate
	72322	3	membrane disrupted	CA074Me	sham	punctate
	72322	3	membrane disrupted	CA074Me	sham	diffuse
	72322	3	membrane disrupted	CA074Me	sham	diffuse
	72322	3	membrane disrupted	CA074Me	sham	diffuse
	72322	3	membrane disrupted	CA074Me	sham	diffuse
	72322	3	membrane disrupted	CA074Me	sham	diffuse
	72322	3	membrane disrupted	CA074Me	sham	diffuse
	72322	3	membrane disrupted	CA074Me	sham	diffuse
	72322	3	membrane disrupted	CA074Me	sham	diffuse
	72322	3	non-disrupted	CA074Me	sham	punctate
	72322	3	non-disrupted	CA074Me	sham	punctate
	72322	3	non-disrupted	CA074Me	sham	punctate
	72322	3	non-disrupted	CA074Me	sham	punctate
	72322	3	non-disrupted	CA074Me	sham	punctate
	72322	3	non-disrupted	CA074Me	sham	punctate
	72322	3	non-disrupted	CA074Me	sham	punctate
	72322	3	non-disrupted	CA074Me	sham	punctate
	72322	3	non-disrupted	CA074Me	sham	punctate
	72322	3	non-disrupted	CA074Me	sham	punctate
	72322	4	membrane disrupted	CA074Me	sham	punctate
	72322	4	membrane disrupted	CA074Me	sham	punctate
	72322	4	membrane disrupted	CA074Me	sham	diffuse
	72322	4	membrane disrupted	CA074Me	sham	diffuse
	72322	4	membrane disrupted	CA074Me	sham	diffuse
	72322	4	membrane disrupted	CA074Me	sham	diffuse
	72322	4	membrane disrupted	CA074Me	sham	diffuse
	72322	4	membrane disrupted	CA074Me	sham	diffuse
	72322	4	non-disrupted	CA074Me	sham	punctate
	72322	4	non-disrupted	CA074Me	sham	punctate
	72322	4	non-disrupted	CA074Me	sham	punctate
	72322	4	non-disrupted	CA074Me	sham	punctate
	72322	4	non-disrupted	CA074Me	sham	punctate
	72322	4	non-disrupted	CA074Me	sham	punctate
	72322	4	non-disrupted	CA074Me	sham	punctate
	72322	4	non-disrupted	CA074Me	sham	punctate
	72322	4	non-disrupted	CA074Me	sham	punctate
	72322	4	non-disrupted	CA074Me	sham	punctate
	72322	5	membrane disrupted	CA074Me	sham	punctate
	72322	5	membrane disrupted	CA074Me	sham	punctate
	72322	5	membrane disrupted	CA074Me	sham	punctate
	72322	5	membrane disrupted	CA074Me	sham	punctate
	72322	5	membrane disrupted	CA074Me	sham	diffuse
	72322	5	membrane disrupted	CA074Me	sham	diffuse
	72322	5	membrane disrupted	CA074Me	sham	diffuse
	72322	5	membrane disrupted	CA074Me	sham	diffuse
	72322	5	membrane disrupted	CA074Me	sham	diffuse
	72322	5	membrane disrupted	CA074Me	sham	diffuse
	72322	5	non-disrupted	CA074Me	sham	punctate
	72322	5	non-disrupted	CA074Me	sham	punctate
	72322	5	non-disrupted	CA074Me	sham	punctate
	72322	5	non-disrupted	CA074Me	sham	punctate
	72322	5	non-disrupted	CA074Me	sham	punctate
	72322	5	non-disrupted	CA074Me	sham	punctate
	72322	5	non-disrupted	CA074Me	sham	punctate
	72322	5	non-disrupted	CA074Me	sham	punctate
	72322	5	non-disrupted	CA074Me	sham	punctate
	72322	5	non-disrupted	CA074Me	sham	punctate
	51021	5	membrane disrupted	CA074Me	sham	punctate
	51021	5	membrane disrupted	CA074Me	sham	punctate
	51021	5	membrane disrupted	CA074Me	sham	punctate
	51021	5	membrane disrupted	CA074Me	sham	diffuse
	51021	5	membrane disrupted	CA074Me	sham	diffuse
	51021	5	membrane disrupted	CA074Me	sham	diffuse
	51021	5	non-disrupted	CA074Me	sham	punctate
	51021	5	non-disrupted	CA074Me	sham	punctate
	51021	5	non-disrupted	CA074Me	sham	punctate
	51021	5	non-disrupted	CA074Me	sham	punctate
	51021	1	membrane disrupted	CA074Me	sham	punctate
	51021	1	membrane disrupted	CA074Me	sham	diffuse
	51021	1	membrane disrupted	CA074Me	sham	diffuse
	51021	2	membrane disrupted	CA074Me	sham	punctate
	51021	2	membrane disrupted	CA074Me	sham	punctate
	51021	2	membrane disrupted	CA074Me	sham	punctate
	51021	2	membrane disrupted	CA074Me	sham	punctate
	51021	2	membrane disrupted	CA074Me	sham	punctate
	51021	2	membrane disrupted	CA074Me	sham	punctate
	51021	2	membrane disrupted	CA074Me	sham	punctate
	51021	2	membrane disrupted	CA074Me	sham	punctate
	51021	2	non-disrupted	CA074Me	sham	punctate
	51021	2	non-disrupted	CA074Me	sham	diffuse
	51021	3	membrane disrupted	CA074Me	sham	punctate
	51021	3	membrane disrupted	CA074Me	sham	punctate
	51021	3	membrane disrupted	CA074Me	sham	punctate
	51021	3	membrane disrupted	CA074Me	sham	punctate
	51021	3	membrane disrupted	CA074Me	sham	diffuse
	51021	3	membrane disrupted	CA074Me	sham	diffuse
	51021	3	membrane disrupted	CA074Me	sham	diffuse
	51021	3	membrane disrupted	CA074Me	sham	diffuse
	51021	3	membrane disrupted	CA074Me	sham	diffuse
	51021	3	membrane disrupted	CA074Me	sham	diffuse
	51021	3	non-disrupted	CA074Me	sham	punctate
	51021	3	non-disrupted	CA074Me	sham	punctate
	51021	3	non-disrupted	CA074Me	sham	punctate
	51021	3	non-disrupted	CA074Me	sham	punctate
	51021	3	non-disrupted	CA074Me	sham	diffuse
	51021	3	non-disrupted	CA074Me	sham	diffuse
	51021	3	non-disrupted	CA074Me	sham	diffuse
	51021	4	membrane disrupted	CA074Me	sham	diffuse
	51021	4	membrane disrupted	CA074Me	sham	diffuse
	51021	4	membrane disrupted	CA074Me	sham	diffuse
	51021	4	membrane disrupted	CA074Me	sham	diffuse
	51021	4	non-disrupted	CA074Me	sham	punctate
	51021	4	non-disrupted	CA074Me	sham	punctate
	51021	4	non-disrupted	CA074Me	sham	punctate
	51021	4	non-disrupted	CA074Me	sham	punctate
	51021	4	non-disrupted	CA074Me	sham	diffuse
	51021	4	non-disrupted	CA074Me	sham	diffuse
	51021	4	non-disrupted	CA074Me	sham	diffuse
	51021	4	non-disrupted	CA074Me	sham	diffuse
	51021	4	non-disrupted	CA074Me	sham	diffuse
	51021	4	non-disrupted	CA074Me	sham	diffuse
	80221	1	non-disrupted	CA074Me	sham	punctate
	80221	1	non-disrupted	CA074Me	sham	punctate
	80221	1	non-disrupted	CA074Me	sham	punctate
	80221	1	non-disrupted	CA074Me	sham	punctate
	80221	1	non-disrupted	CA074Me	sham	punctate
	80221	1	non-disrupted	CA074Me	sham	punctate
	80221	1	non-disrupted	CA074Me	sham	punctate
	80221	1	non-disrupted	CA074Me	sham	punctate
	80221	1	non-disrupted	CA074Me	sham	diffuse
	80221	1	non-disrupted	CA074Me	sham	punctate
	80221	2	membrane disrupted	CA074Me	sham	punctate
	80221	2	membrane disrupted	CA074Me	sham	punctate
	80221	2	membrane disrupted	CA074Me	sham	punctate
	80221	2	non-disrupted	CA074Me	sham	punctate
	80221	2	non-disrupted	CA074Me	sham	punctate
	80221	2	non-disrupted	CA074Me	sham	punctate
	80221	2	non-disrupted	CA074Me	sham	punctate
	80221	2	non-disrupted	CA074Me	sham	punctate
	80221	2	non-disrupted	CA074Me	sham	punctate
	80221	3	membrane disrupted	CA074Me	sham	punctate
	80221	3	membrane disrupted	CA074Me	sham	punctate
	80221	3	membrane disrupted	CA074Me	sham	punctate
	80221	3	membrane disrupted	CA074Me	sham	punctate
	80221	3	non-disrupted	CA074Me	sham	punctate
	80221	3	non-disrupted	CA074Me	sham	punctate
	80221	3	non-disrupted	CA074Me	sham	punctate
	80221	3	non-disrupted	CA074Me	sham	punctate
	80221	3	non-disrupted	CA074Me	sham	punctate
	80221	3	non-disrupted	CA074Me	sham	punctate
	80221	3	non-disrupted	CA074Me	sham	punctate
	80221	3	non-disrupted	CA074Me	sham	punctate
	80221	3	non-disrupted	CA074Me	sham	punctate
	80221	4	membrane disrupted	CA074Me	sham	diffuse
	80221	4	membrane disrupted	CA074Me	sham	diffuse
	80221	4	membrane disrupted	CA074Me	sham	diffuse
	80221	4	membrane disrupted	CA074Me	sham	punctate
	80221	4	membrane disrupted	CA074Me	sham	punctate
	80221	4	non-disrupted	CA074Me	sham	diffuse
	80221	4	non-disrupted	CA074Me	sham	punctate
	80221	4	non-disrupted	CA074Me	sham	punctate
	80221	4	non-disrupted	CA074Me	sham	punctate
	80221	4	non-disrupted	CA074Me	sham	punctate
	80221	4	non-disrupted	CA074Me	sham	punctate
	80221	4	non-disrupted	CA074Me	sham	punctate
	80221	4	non-disrupted	CA074Me	sham	diffuse
	80221	4	non-disrupted	CA074Me	sham	punctate
	80221	4	non-disrupted	CA074Me	sham	punctate
	80221	5	non-disrupted	CA074Me	sham	punctate
	80221	5	non-disrupted	CA074Me	sham	diffuse
	80221	5	non-disrupted	CA074Me	sham	punctate
	80221	5	non-disrupted	CA074Me	sham	punctate
	80221	5	non-disrupted	CA074Me	sham	punctate
	80221	5	non-disrupted	CA074Me	sham	punctate
	80221	5	non-disrupted	CA074Me	sham	diffuse
	80221	5	non-disrupted	CA074Me	sham	punctate
	80221	5	non-disrupted	CA074Me	sham	punctate
	80221	5	non-disrupted	CA074Me	sham	punctate
	80221	6	non-disrupted	CA074Me	sham	punctate
	80221	6	non-disrupted	CA074Me	sham	punctate
	80221	6	non-disrupted	CA074Me	sham	punctate
	80221	6	non-disrupted	CA074Me	sham	punctate
	80221	6	non-disrupted	CA074Me	sham	punctate
	80221	6	non-disrupted	CA074Me	sham	punctate
	80221	6	non-disrupted	CA074Me	sham	punctate
	80221	6	non-disrupted	CA074Me	sham	punctate
	80221	6	non-disrupted	CA074Me	sham	punctate
	80221	6	non-disrupted	CA074Me	sham	punctate
	22122	1	membrane disrupted	CA074Me	sham	punctate
	22122	1	membrane disrupted	CA074Me	sham	diffuse
	22122	1	membrane disrupted	CA074Me	sham	diffuse
	22122	1	non-disrupted	CA074Me	sham	punctate
	22122	1	non-disrupted	CA074Me	sham	punctate
	22122	1	non-disrupted	CA074Me	sham	punctate
	22122	1	non-disrupted	CA074Me	sham	diffuse
	22122	1	non-disrupted	CA074Me	sham	diffuse
	22122	1	non-disrupted	CA074Me	sham	diffuse
	22122	1	non-disrupted	CA074Me	sham	punctate
	22122	1	non-disrupted	CA074Me	sham	diffuse
	22122	1	non-disrupted	CA074Me	sham	punctate
	22122	1	non-disrupted	CA074Me	sham	punctate
	22122	2	membrane disrupted	CA074Me	sham	diffuse
	22122	2	membrane disrupted	CA074Me	sham	diffuse
	22122	2	membrane disrupted	CA074Me	sham	diffuse
	22122	2	membrane disrupted	CA074Me	sham	diffuse
	22122	2	membrane disrupted	CA074Me	sham	diffuse
	22122	2	membrane disrupted	CA074Me	sham	punctate
	22122	2	membrane disrupted	CA074Me	sham	diffuse
	22122	2	membrane disrupted	CA074Me	sham	diffuse
	22122	2	membrane disrupted	CA074Me	sham	diffuse
	22122	2	membrane disrupted	CA074Me	sham	diffuse
	22122	2	non-disrupted	CA074Me	sham	punctate
	22122	2	non-disrupted	CA074Me	sham	punctate
	22122	2	non-disrupted	CA074Me	sham	diffuse
	22122	2	non-disrupted	CA074Me	sham	diffuse
	22122	2	non-disrupted	CA074Me	sham	diffuse
	22122	2	non-disrupted	CA074Me	sham	diffuse
	22122	2	non-disrupted	CA074Me	sham	punctate
	22122	2	non-disrupted	CA074Me	sham	punctate
	22122	2	non-disrupted	CA074Me	sham	diffuse
	22122	3	membrane disrupted	CA074Me	sham	punctate
	22122	3	membrane disrupted	CA074Me	sham	punctate
	22122	3	membrane disrupted	CA074Me	sham	punctate
	22122	3	membrane disrupted	CA074Me	sham	punctate
	22122	3	membrane disrupted	CA074Me	sham	diffuse
	22122	3	membrane disrupted	CA074Me	sham	diffuse
	22122	3	membrane disrupted	CA074Me	sham	punctate
	22122	3	membrane disrupted	CA074Me	sham	diffuse
	22122	3	membrane disrupted	CA074Me	sham	diffuse
	22122	3	non-disrupted	CA074Me	sham	diffuse
	22122	3	non-disrupted	CA074Me	sham	diffuse
	22122	3	non-disrupted	CA074Me	sham	punctate
	22122	3	non-disrupted	CA074Me	sham	punctate
	22122	3	non-disrupted	CA074Me	sham	punctate
	22122	3	non-disrupted	CA074Me	sham	punctate
	22122	3	non-disrupted	CA074Me	sham	punctate
	22122	3	non-disrupted	CA074Me	sham	punctate
	22122	3	non-disrupted	CA074Me	sham	punctate
	22122	3	non-disrupted	CA074Me	sham	punctate
	22122	4	membrane disrupted	CA074Me	sham	diffuse
	22122	4	membrane disrupted	CA074Me	sham	diffuse
	22122	4	membrane disrupted	CA074Me	sham	diffuse
	22122	4	membrane disrupted	CA074Me	sham	diffuse
	22122	4	non-disrupted	CA074Me	sham	punctate
	22122	4	non-disrupted	CA074Me	sham	punctate
	22122	4	non-disrupted	CA074Me	sham	punctate
	22122	4	non-disrupted	CA074Me	sham	punctate
	22122	4	non-disrupted	CA074Me	sham	punctate
	22122	4	non-disrupted	CA074Me	sham	diffuse
	22122	4	non-disrupted	CA074Me	sham	punctate
	22122	4	non-disrupted	CA074Me	sham	punctate
	22122	4	non-disrupted	CA074Me	sham	punctate
	22122	4	non-disrupted	CA074Me	sham	diffuse
	22122	5	non-disrupted	CA074Me	sham	punctate
	22122	5	non-disrupted	CA074Me	sham	punctate
	22122	5	non-disrupted	CA074Me	sham	punctate
	22122	5	non-disrupted	CA074Me	sham	punctate
	22122	5	non-disrupted	CA074Me	sham	punctate
	22122	5	non-disrupted	CA074Me	sham	punctate
	22122	5	non-disrupted	CA074Me	sham	punctate
	22122	5	non-disrupted	CA074Me	sham	punctate
	22122	5	non-disrupted	CA074Me	sham	punctate
	22122	5	non-disrupted	CA074Me	sham	punctate
	72022	1	membrane disrupted	10% DMSO	injury only	punctate
	72022	1	membrane disrupted	10% DMSO	injury only	diffuse
	72022	1	membrane disrupted	10% DMSO	injury only	diffuse
	72022	1	membrane disrupted	10% DMSO	injury only	diffuse
	72022	1	membrane disrupted	10% DMSO	injury only	diffuse
	72022	1	non-disrupted	10% DMSO	injury only	diffuse
	72022	1	non-disrupted	10% DMSO	injury only	diffuse
	72022	1	non-disrupted	10% DMSO	injury only	diffuse
	72022	1	non-disrupted	10% DMSO	injury only	diffuse
	72022	1	non-disrupted	10% DMSO	injury only	diffuse
	72022	1	non-disrupted	10% DMSO	injury only	diffuse
	72022	1	non-disrupted	10% DMSO	injury only	diffuse
	72022	1	non-disrupted	10% DMSO	injury only	diffuse
	72022	1	non-disrupted	10% DMSO	injury only	diffuse
	72022	1	non-disrupted	10% DMSO	injury only	diffuse
	72022	2	non-disrupted	10% DMSO	injury only	punctate
	72022	2	non-disrupted	10% DMSO	injury only	punctate
	72022	2	non-disrupted	10% DMSO	injury only	punctate
	72022	3	membrane disrupted	10% DMSO	injury only	punctate
	72022	3	membrane disrupted	10% DMSO	injury only	punctate
	72022	3	membrane disrupted	10% DMSO	injury only	punctate
	72022	3	membrane disrupted	10% DMSO	injury only	punctate
	72022	3	membrane disrupted	10% DMSO	injury only	punctate
	72022	3	membrane disrupted	10% DMSO	injury only	diffuse
	72022	3	membrane disrupted	10% DMSO	injury only	diffuse
	72022	3	membrane disrupted	10% DMSO	injury only	diffuse
	72022	3	membrane disrupted	10% DMSO	injury only	diffuse
	72022	3	membrane disrupted	10% DMSO	injury only	diffuse
	72022	3	non-disrupted	10% DMSO	injury only	punctate
	72022	3	non-disrupted	10% DMSO	injury only	diffuse
	72022	3	non-disrupted	10% DMSO	injury only	diffuse
	72022	3	non-disrupted	10% DMSO	injury only	diffuse
	72022	3	non-disrupted	10% DMSO	injury only	diffuse
	72022	3	non-disrupted	10% DMSO	injury only	diffuse
	72022	3	non-disrupted	10% DMSO	injury only	diffuse
	72022	3	non-disrupted	10% DMSO	injury only	diffuse
	72022	3	non-disrupted	10% DMSO	injury only	diffuse
	72022	3	non-disrupted	10% DMSO	injury only	diffuse
	72022	4	membrane disrupted	10% DMSO	injury only	punctate
	72022	4	membrane disrupted	10% DMSO	injury only	punctate
	72022	4	membrane disrupted	10% DMSO	injury only	punctate
	72022	4	membrane disrupted	10% DMSO	injury only	punctate
	72022	4	membrane disrupted	10% DMSO	injury only	punctate
	72022	4	membrane disrupted	10% DMSO	injury only	punctate
	72022	4	membrane disrupted	10% DMSO	injury only	punctate
	72022	4	membrane disrupted	10% DMSO	injury only	punctate
	72022	4	membrane disrupted	10% DMSO	injury only	punctate
	72022	4	membrane disrupted	10% DMSO	injury only	punctate
	72022	4	non-disrupted	10% DMSO	injury only	punctate
	72022	4	non-disrupted	10% DMSO	injury only	punctate
	72022	4	non-disrupted	10% DMSO	injury only	diffuse
	72022	4	non-disrupted	10% DMSO	injury only	diffuse
	72022	4	non-disrupted	10% DMSO	injury only	diffuse
	72022	4	non-disrupted	10% DMSO	injury only	diffuse
	72022	4	non-disrupted	10% DMSO	injury only	diffuse
	72022	4	non-disrupted	10% DMSO	injury only	diffuse
	72022	4	non-disrupted	10% DMSO	injury only	diffuse
	72022	4	non-disrupted	10% DMSO	injury only	diffuse
	72022	5	non-disrupted	10% DMSO	injury only	punctate
	72022	5	non-disrupted	10% DMSO	injury only	diffuse
	72022	5	non-disrupted	10% DMSO	injury only	diffuse
	72022	5	non-disrupted	10% DMSO	injury only	diffuse
	72022	5	non-disrupted	10% DMSO	injury only	diffuse
	72022	5	non-disrupted	10% DMSO	injury only	diffuse
	72022	5	non-disrupted	10% DMSO	injury only	diffuse
	72022	5	non-disrupted	10% DMSO	injury only	diffuse
	72022	5	non-disrupted	10% DMSO	injury only	diffuse
	72022	5	membrane disrupted	10% DMSO	injury only	punctate
	72022	5	membrane disrupted	10% DMSO	injury only	punctate
	72022	5	membrane disrupted	10% DMSO	injury only	punctate
	72022	5	membrane disrupted	10% DMSO	injury only	punctate
	72022	5	membrane disrupted	10% DMSO	injury only	punctate
	72022	5	membrane disrupted	10% DMSO	injury only	diffuse
	72022	5	membrane disrupted	10% DMSO	injury only	diffuse
	72022	5	membrane disrupted	10% DMSO	injury only	diffuse
	72022	5	membrane disrupted	10% DMSO	injury only	diffuse
	41922	1	membrane disrupted	10% DMSO	injury only	punctate
	41922	1	membrane disrupted	10% DMSO	injury only	punctate
	41922	1	membrane disrupted	10% DMSO	injury only	punctate
	41922	1	membrane disrupted	10% DMSO	injury only	punctate
	41922	1	membrane disrupted	10% DMSO	injury only	punctate
	41922	1	membrane disrupted	10% DMSO	injury only	diffuse
	41922	1	membrane disrupted	10% DMSO	injury only	diffuse
	41922	1	membrane disrupted	10% DMSO	injury only	diffuse
	41922	1	membrane disrupted	10% DMSO	injury only	diffuse
	41922	1	membrane disrupted	10% DMSO	injury only	diffuse
	41922	1	non-disrupted	10% DMSO	injury only	punctate
	41922	1	non-disrupted	10% DMSO	injury only	punctate
	41922	1	non-disrupted	10% DMSO	injury only	punctate
	41922	1	non-disrupted	10% DMSO	injury only	punctate
	41922	1	non-disrupted	10% DMSO	injury only	punctate
	41922	1	non-disrupted	10% DMSO	injury only	punctate
	41922	1	non-disrupted	10% DMSO	injury only	punctate
	41922	1	non-disrupted	10% DMSO	injury only	punctate
	41922	1	non-disrupted	10% DMSO	injury only	diffuse
	41922	1	non-disrupted	10% DMSO	injury only	diffuse
	41922	2	membrane disrupted	10% DMSO	injury only	diffuse
	41922	2	membrane disrupted	10% DMSO	injury only	diffuse
	41922	2	membrane disrupted	10% DMSO	injury only	diffuse
	41922	2	membrane disrupted	10% DMSO	injury only	diffuse
	41922	2	membrane disrupted	10% DMSO	injury only	diffuse
	41922	2	membrane disrupted	10% DMSO	injury only	diffuse
	41922	2	membrane disrupted	10% DMSO	injury only	diffuse
	41922	2	membrane disrupted	10% DMSO	injury only	diffuse
	41922	2	membrane disrupted	10% DMSO	injury only	diffuse
	41922	2	membrane disrupted	10% DMSO	injury only	diffuse
	41922	2	non-disrupted	10% DMSO	injury only	punctate
	41922	2	non-disrupted	10% DMSO	injury only	punctate
	41922	2	non-disrupted	10% DMSO	injury only	punctate
	41922	2	non-disrupted	10% DMSO	injury only	punctate
	41922	2	non-disrupted	10% DMSO	injury only	punctate
	41922	2	non-disrupted	10% DMSO	injury only	punctate
	41922	2	non-disrupted	10% DMSO	injury only	punctate
	41922	2	non-disrupted	10% DMSO	injury only	punctate
	41922	2	non-disrupted	10% DMSO	injury only	punctate
	41922	2	non-disrupted	10% DMSO	injury only	punctate
	41922	3	membrane disrupted	10% DMSO	injury only	diffuse
	41922	3	membrane disrupted	10% DMSO	injury only	diffuse
	41922	3	membrane disrupted	10% DMSO	injury only	diffuse
	41922	3	membrane disrupted	10% DMSO	injury only	diffuse
	41922	3	membrane disrupted	10% DMSO	injury only	diffuse
	41922	3	membrane disrupted	10% DMSO	injury only	diffuse
	41922	3	membrane disrupted	10% DMSO	injury only	diffuse
	41922	3	membrane disrupted	10% DMSO	injury only	diffuse
	41922	3	membrane disrupted	10% DMSO	injury only	diffuse
	41922	3	membrane disrupted	10% DMSO	injury only	diffuse
	41922	3	non-disrupted	10% DMSO	injury only	punctate
	41922	3	non-disrupted	10% DMSO	injury only	punctate
	41922	3	non-disrupted	10% DMSO	injury only	punctate
	41922	3	non-disrupted	10% DMSO	injury only	punctate
	41922	3	non-disrupted	10% DMSO	injury only	punctate
	41922	3	non-disrupted	10% DMSO	injury only	punctate
	41922	3	non-disrupted	10% DMSO	injury only	punctate
	41922	3	non-disrupted	10% DMSO	injury only	punctate
	41922	3	non-disrupted	10% DMSO	injury only	punctate
	41922	3	non-disrupted	10% DMSO	injury only	punctate
	41922	4	membrane disrupted	10% DMSO	injury only	punctate
	41922	4	membrane disrupted	10% DMSO	injury only	punctate
	41922	4	membrane disrupted	10% DMSO	injury only	punctate
	41922	4	membrane disrupted	10% DMSO	injury only	diffuse
	41922	4	membrane disrupted	10% DMSO	injury only	diffuse
	41922	4	membrane disrupted	10% DMSO	injury only	diffuse
	41922	4	membrane disrupted	10% DMSO	injury only	diffuse
	41922	4	membrane disrupted	10% DMSO	injury only	diffuse
	41922	4	membrane disrupted	10% DMSO	injury only	diffuse
	41922	4	membrane disrupted	10% DMSO	injury only	diffuse
	41922	4	non-disrupted	10% DMSO	injury only	punctate
	41922	4	non-disrupted	10% DMSO	injury only	punctate
	41922	4	non-disrupted	10% DMSO	injury only	punctate
	41922	4	non-disrupted	10% DMSO	injury only	punctate
	41922	4	non-disrupted	10% DMSO	injury only	punctate
	41922	4	non-disrupted	10% DMSO	injury only	punctate
	41922	4	non-disrupted	10% DMSO	injury only	punctate
	41922	4	non-disrupted	10% DMSO	injury only	punctate
	41922	4	non-disrupted	10% DMSO	injury only	punctate
	41922	5	membrane disrupted	10% DMSO	injury only	punctate
	41922	5	membrane disrupted	10% DMSO	injury only	punctate
	41922	5	membrane disrupted	10% DMSO	injury only	diffuse
	41922	5	membrane disrupted	10% DMSO	injury only	diffuse
	41922	5	membrane disrupted	10% DMSO	injury only	diffuse
	41922	5	membrane disrupted	10% DMSO	injury only	diffuse
	41922	5	membrane disrupted	10% DMSO	injury only	diffuse
	41922	5	membrane disrupted	10% DMSO	injury only	diffuse
	41922	5	membrane disrupted	10% DMSO	injury only	diffuse
	41922	5	membrane disrupted	10% DMSO	injury only	diffuse
	41922	5	non-disrupted	10% DMSO	injury only	punctate
	41922	5	non-disrupted	10% DMSO	injury only	punctate
	41922	5	non-disrupted	10% DMSO	injury only	punctate
	41922	5	non-disrupted	10% DMSO	injury only	punctate
	41922	5	non-disrupted	10% DMSO	injury only	punctate
	41922	5	non-disrupted	10% DMSO	injury only	punctate
	41922	5	non-disrupted	10% DMSO	injury only	punctate
	41922	5	non-disrupted	10% DMSO	injury only	diffuse
	41922	5	non-disrupted	10% DMSO	injury only	diffuse
	41922	5	non-disrupted	10% DMSO	injury only	diffuse
	31121	1	membrane disrupted	10% DMSO	injury only	punctate
	31121	1	membrane disrupted	10% DMSO	injury only	punctate
	31121	1	membrane disrupted	10% DMSO	injury only	punctate
	31121	1	membrane disrupted	10% DMSO	injury only	punctate
	31121	1	membrane disrupted	10% DMSO	injury only	punctate
	31121	1	membrane disrupted	10% DMSO	injury only	diffuse
	31121	1	membrane disrupted	10% DMSO	injury only	diffuse
	31121	1	membrane disrupted	10% DMSO	injury only	diffuse
	31121	1	membrane disrupted	10% DMSO	injury only	diffuse
	31121	1	membrane disrupted	10% DMSO	injury only	diffuse
	31121	1	non-disrupted	10% DMSO	injury only	diffuse
	31121	1	non-disrupted	10% DMSO	injury only	diffuse
	31121	1	non-disrupted	10% DMSO	injury only	diffuse
	31121	1	non-disrupted	10% DMSO	injury only	diffuse
	31121	1	non-disrupted	10% DMSO	injury only	diffuse
	31121	1	non-disrupted	10% DMSO	injury only	diffuse
	31121	1	non-disrupted	10% DMSO	injury only	diffuse
	31121	1	non-disrupted	10% DMSO	injury only	diffuse
	31121	1	non-disrupted	10% DMSO	injury only	diffuse
	31121	1	non-disrupted	10% DMSO	injury only	diffuse
	31121	2	membrane disrupted	10% DMSO	injury only	diffuse
	31121	2	membrane disrupted	10% DMSO	injury only	diffuse
	31121	2	membrane disrupted	10% DMSO	injury only	diffuse
	31121	2	membrane disrupted	10% DMSO	injury only	diffuse
	31121	2	membrane disrupted	10% DMSO	injury only	diffuse
	31121	2	membrane disrupted	10% DMSO	injury only	diffuse
	31121	2	membrane disrupted	10% DMSO	injury only	diffuse
	31121	2	non-disrupted	10% DMSO	injury only	punctate
	31121	2	non-disrupted	10% DMSO	injury only	punctate
	31121	2	non-disrupted	10% DMSO	injury only	punctate
	31121	2	non-disrupted	10% DMSO	injury only	punctate
	31121	2	non-disrupted	10% DMSO	injury only	punctate
	31121	2	non-disrupted	10% DMSO	injury only	punctate
	31121	2	non-disrupted	10% DMSO	injury only	punctate
	31121	2	non-disrupted	10% DMSO	injury only	punctate
	31121	2	non-disrupted	10% DMSO	injury only	punctate
	31121	2	non-disrupted	10% DMSO	injury only	diffuse
	31121	3	membrane disrupted	10% DMSO	injury only	punctate
	31121	3	membrane disrupted	10% DMSO	injury only	punctate
	31121	3	membrane disrupted	10% DMSO	injury only	punctate
	31121	3	membrane disrupted	10% DMSO	injury only	punctate
	31121	3	membrane disrupted	10% DMSO	injury only	punctate
	31121	3	membrane disrupted	10% DMSO	injury only	punctate
	31121	3	membrane disrupted	10% DMSO	injury only	punctate
	31121	3	membrane disrupted	10% DMSO	injury only	punctate
	31121	3	membrane disrupted	10% DMSO	injury only	punctate
	31121	3	membrane disrupted	10% DMSO	injury only	punctate
	31121	3	non-disrupted	10% DMSO	injury only	punctate
	31121	3	non-disrupted	10% DMSO	injury only	punctate
	31121	3	non-disrupted	10% DMSO	injury only	punctate
	31121	3	non-disrupted	10% DMSO	injury only	punctate
	31121	3	non-disrupted	10% DMSO	injury only	punctate
	31121	3	non-disrupted	10% DMSO	injury only	punctate
	31121	3	non-disrupted	10% DMSO	injury only	punctate
	31121	3	non-disrupted	10% DMSO	injury only	punctate
	31121	3	non-disrupted	10% DMSO	injury only	punctate
	31121	3	non-disrupted	10% DMSO	injury only	punctate
	31121	4	membrane disrupted	10% DMSO	injury only	punctate
	31121	4	membrane disrupted	10% DMSO	injury only	punctate
	31121	4	membrane disrupted	10% DMSO	injury only	diffuse
	31121	4	membrane disrupted	10% DMSO	injury only	diffuse
	31121	4	membrane disrupted	10% DMSO	injury only	diffuse
	31121	4	membrane disrupted	10% DMSO	injury only	diffuse
	31121	4	membrane disrupted	10% DMSO	injury only	diffuse
	31121	4	membrane disrupted	10% DMSO	injury only	diffuse
	31121	4	membrane disrupted	10% DMSO	injury only	diffuse
	31121	4	membrane disrupted	10% DMSO	injury only	diffuse
	31121	4	non-disrupted	10% DMSO	injury only	punctate
	31121	4	non-disrupted	10% DMSO	injury only	punctate
	31121	4	non-disrupted	10% DMSO	injury only	punctate
	31121	4	non-disrupted	10% DMSO	injury only	punctate
	31121	4	non-disrupted	10% DMSO	injury only	punctate
	31121	4	non-disrupted	10% DMSO	injury only	punctate
	31121	4	non-disrupted	10% DMSO	injury only	punctate
	31121	4	non-disrupted	10% DMSO	injury only	punctate
	31121	4	non-disrupted	10% DMSO	injury only	punctate
	31121	4	non-disrupted	10% DMSO	injury only	punctate
	31121	5	membrane disrupted	10% DMSO	injury only	punctate
	31121	5	membrane disrupted	10% DMSO	injury only	punctate
	31121	5	membrane disrupted	10% DMSO	injury only	diffuse
	31121	5	membrane disrupted	10% DMSO	injury only	diffuse
	31121	5	membrane disrupted	10% DMSO	injury only	diffuse
	31121	5	membrane disrupted	10% DMSO	injury only	diffuse
	31121	5	membrane disrupted	10% DMSO	injury only	diffuse
	31121	5	membrane disrupted	10% DMSO	injury only	diffuse
	31121	5	membrane disrupted	10% DMSO	injury only	diffuse
	31121	5	membrane disrupted	10% DMSO	injury only	diffuse
	31121	5	non-disrupted	10% DMSO	injury only	punctate
	31121	5	non-disrupted	10% DMSO	injury only	punctate
	31121	5	non-disrupted	10% DMSO	injury only	punctate
	31121	5	non-disrupted	10% DMSO	injury only	punctate
	31121	5	non-disrupted	10% DMSO	injury only	punctate
	31121	5	non-disrupted	10% DMSO	injury only	punctate
	31121	5	non-disrupted	10% DMSO	injury only	punctate
	31121	5	non-disrupted	10% DMSO	injury only	diffuse
	31121	5	non-disrupted	10% DMSO	injury only	diffuse
	31121	5	non-disrupted	10% DMSO	injury only	diffuse
	22322	1	membrane disrupted	10% DMSO	injury only	diffuse
	22322	1	membrane disrupted	10% DMSO	injury only	diffuse
	22322	2	membrane disrupted	10% DMSO	injury only	diffuse
	22322	2	membrane disrupted	10% DMSO	injury only	diffuse
	22322	2	membrane disrupted	10% DMSO	injury only	diffuse
	22322	2	membrane disrupted	10% DMSO	injury only	diffuse
	22322	2	membrane disrupted	10% DMSO	injury only	diffuse
	22322	3	membrane disrupted	10% DMSO	injury only	punctate
	22322	3	membrane disrupted	10% DMSO	injury only	punctate
	22322	3	membrane disrupted	10% DMSO	injury only	punctate
	22322	3	membrane disrupted	10% DMSO	injury only	diffuse
	22322	3	membrane disrupted	10% DMSO	injury only	diffuse
	22322	3	membrane disrupted	10% DMSO	injury only	diffuse
	22322	3	membrane disrupted	10% DMSO	injury only	diffuse
	22322	3	membrane disrupted	10% DMSO	injury only	diffuse
	51321	1	membrane disrupted	10% DMSO	injury only	punctate
	51321	1	membrane disrupted	10% DMSO	injury only	punctate
	51321	1	non-disrupted	10% DMSO	injury only	punctate
	51321	1	non-disrupted	10% DMSO	injury only	punctate
	51321	2	non-disrupted	10% DMSO	injury only	diffuse
	51321	2	non-disrupted	10% DMSO	injury only	diffuse
	51321	2	non-disrupted	10% DMSO	injury only	diffuse
	51321	2	non-disrupted	10% DMSO	injury only	punctate
	51321	2	non-disrupted	10% DMSO	injury only	punctate
	51321	2	non-disrupted	10% DMSO	injury only	punctate
	51321	2	non-disrupted	10% DMSO	injury only	punctate
	51321	2	non-disrupted	10% DMSO	injury only	punctate
	51321	2	non-disrupted	10% DMSO	injury only	punctate
	51321	2	non-disrupted	10% DMSO	injury only	punctate
	51321	3	membrane disrupted	10% DMSO	injury only	diffuse
	51321	3	membrane disrupted	10% DMSO	injury only	diffuse
	51321	3	membrane disrupted	10% DMSO	injury only	punctate
	51321	3	membrane disrupted	10% DMSO	injury only	punctate
	51321	3	non-disrupted	10% DMSO	injury only	diffuse
	51321	3	non-disrupted	10% DMSO	injury only	punctate
	51321	3	non-disrupted	10% DMSO	injury only	punctate
	51321	3	non-disrupted	10% DMSO	injury only	diffuse
	51321	3	non-disrupted	10% DMSO	injury only	punctate
	51321	3	non-disrupted	10% DMSO	injury only	punctate
	51321	3	non-disrupted	10% DMSO	injury only	punctate
	51321	3	non-disrupted	10% DMSO	injury only	punctate
	51321	3	non-disrupted	10% DMSO	injury only	diffuse
	51321	4	membrane disrupted	10% DMSO	injury only	diffuse
	51321	4	membrane disrupted	10% DMSO	injury only	diffuse
	51321	4	membrane disrupted	10% DMSO	injury only	punctate
	51321	4	membrane disrupted	10% DMSO	injury only	diffuse
	51321	4	membrane disrupted	10% DMSO	injury only	punctate
	51321	4	membrane disrupted	10% DMSO	injury only	diffuse
	51321	4	non-disrupted	10% DMSO	injury only	punctate
	51321	4	non-disrupted	10% DMSO	injury only	diffuse
	51321	4	non-disrupted	10% DMSO	injury only	punctate
	51321	4	non-disrupted	10% DMSO	injury only	punctate
	51321	4	non-disrupted	10% DMSO	injury only	diffuse
	51321	4	non-disrupted	10% DMSO	injury only	punctate
	51321	4	non-disrupted	10% DMSO	injury only	punctate
	51321	4	non-disrupted	10% DMSO	injury only	punctate
	51321	4	non-disrupted	10% DMSO	injury only	diffuse
	51321	4	non-disrupted	10% DMSO	injury only	punctate
	51321	5	non-disrupted	10% DMSO	injury only	punctate
	51321	5	non-disrupted	10% DMSO	injury only	diffuse
	51321	5	non-disrupted	10% DMSO	injury only	punctate
	51321	5	non-disrupted	10% DMSO	injury only	punctate
	51321	5	non-disrupted	10% DMSO	injury only	punctate
	51321	5	non-disrupted	10% DMSO	injury only	punctate
	51321	5	non-disrupted	10% DMSO	injury only	punctate
	51321	5	non-disrupted	10% DMSO	injury only	punctate
	51321	5	non-disrupted	10% DMSO	injury only	punctate
	51321	6	non-disrupted	10% DMSO	injury only	punctate
	51321	6	non-disrupted	10% DMSO	injury only	punctate
	51321	6	non-disrupted	10% DMSO	injury only	diffuse
	51321	6	non-disrupted	10% DMSO	injury only	punctate
	51321	6	non-disrupted	10% DMSO	injury only	diffuse
	51321	6	non-disrupted	10% DMSO	injury only	punctate
	51321	6	non-disrupted	10% DMSO	injury only	punctate
	51321	6	non-disrupted	10% DMSO	injury only	punctate
	51321	6	non-disrupted	10% DMSO	injury only	punctate
	100421	1	non-disrupted	10% DMSO	injury only	punctate
	100421	1	non-disrupted	10% DMSO	injury only	punctate
	100421	1	non-disrupted	10% DMSO	injury only	punctate
	100421	1	non-disrupted	10% DMSO	injury only	punctate
	100421	1	non-disrupted	10% DMSO	injury only	punctate
	100421	1	non-disrupted	10% DMSO	injury only	punctate
	100421	1	non-disrupted	10% DMSO	injury only	diffuse
	100421	1	non-disrupted	10% DMSO	injury only	punctate
	100421	1	non-disrupted	10% DMSO	injury only	punctate
	100421	1	non-disrupted	10% DMSO	injury only	diffuse
	100421	2	membrane disrupted	10% DMSO	injury only	punctate
	100421	2	membrane disrupted	10% DMSO	injury only	punctate
	100421	2	membrane disrupted	10% DMSO	injury only	diffuse
	100421	2	membrane disrupted	10% DMSO	injury only	diffuse
	100421	2	membrane disrupted	10% DMSO	injury only	diffuse
	100421	2	membrane disrupted	10% DMSO	injury only	diffuse
	100421	2	membrane disrupted	10% DMSO	injury only	diffuse
	100421	2	membrane disrupted	10% DMSO	injury only	diffuse
	100421	2	membrane disrupted	10% DMSO	injury only	diffuse
	100421	2	membrane disrupted	10% DMSO	injury only	diffuse
	100421	2	non-disrupted	10% DMSO	injury only	punctate
	100421	2	non-disrupted	10% DMSO	injury only	punctate
	100421	2	non-disrupted	10% DMSO	injury only	punctate
	100421	2	non-disrupted	10% DMSO	injury only	punctate
	100421	2	non-disrupted	10% DMSO	injury only	punctate
	100421	2	non-disrupted	10% DMSO	injury only	punctate
	100421	2	non-disrupted	10% DMSO	injury only	punctate
	100421	2	non-disrupted	10% DMSO	injury only	punctate
	100421	2	non-disrupted	10% DMSO	injury only	diffuse
	100421	2	non-disrupted	10% DMSO	injury only	punctate
	100421	3	membrane disrupted	10% DMSO	injury only	punctate
	100421	3	membrane disrupted	10% DMSO	injury only	diffuse
	100421	3	membrane disrupted	10% DMSO	injury only	diffuse
	100421	3	membrane disrupted	10% DMSO	injury only	diffuse
	100421	3	membrane disrupted	10% DMSO	injury only	diffuse
	100421	3	membrane disrupted	10% DMSO	injury only	diffuse
	100421	3	membrane disrupted	10% DMSO	injury only	diffuse
	100421	3	membrane disrupted	10% DMSO	injury only	punctate
	100421	3	non-disrupted	10% DMSO	injury only	punctate
	100421	3	non-disrupted	10% DMSO	injury only	punctate
	100421	3	non-disrupted	10% DMSO	injury only	punctate
	100421	3	non-disrupted	10% DMSO	injury only	punctate
	100421	3	non-disrupted	10% DMSO	injury only	punctate
	100421	3	non-disrupted	10% DMSO	injury only	punctate
	100421	3	non-disrupted	10% DMSO	injury only	punctate
	100421	3	non-disrupted	10% DMSO	injury only	diffuse
	100421	4	membrane disrupted	10% DMSO	injury only	punctate
	100421	4	membrane disrupted	10% DMSO	injury only	punctate
	100421	4	membrane disrupted	10% DMSO	injury only	punctate
	100421	4	membrane disrupted	10% DMSO	injury only	punctate
	100421	4	membrane disrupted	10% DMSO	injury only	punctate
	100421	4	membrane disrupted	10% DMSO	injury only	diffuse
	100421	4	membrane disrupted	10% DMSO	injury only	diffuse
	100421	4	membrane disrupted	10% DMSO	injury only	diffuse
	100421	4	non-disrupted	10% DMSO	injury only	punctate
	100421	4	non-disrupted	10% DMSO	injury only	punctate
	100421	4	non-disrupted	10% DMSO	injury only	punctate
	100421	4	non-disrupted	10% DMSO	injury only	punctate
	100421	4	non-disrupted	10% DMSO	injury only	diffuse
	100421	4	non-disrupted	10% DMSO	injury only	diffuse
	100421	4	non-disrupted	10% DMSO	injury only	diffuse
	100421	4	non-disrupted	10% DMSO	injury only	punctate
	100421	5	membrane disrupted	10% DMSO	injury only	punctate
	100421	5	membrane disrupted	10% DMSO	injury only	punctate
	100421	5	membrane disrupted	10% DMSO	injury only	punctate
	100421	5	membrane disrupted	10% DMSO	injury only	punctate
	100421	5	membrane disrupted	10% DMSO	injury only	punctate
	100421	5	membrane disrupted	10% DMSO	injury only	diffuse
	100421	5	membrane disrupted	10% DMSO	injury only	diffuse
	100421	5	membrane disrupted	10% DMSO	injury only	diffuse
	100421	5	membrane disrupted	10% DMSO	injury only	punctate
	100421	5	membrane disrupted	10% DMSO	injury only	punctate
	100421	5	non-disrupted	10% DMSO	injury only	punctate
	100421	5	non-disrupted	10% DMSO	injury only	punctate
	100421	5	non-disrupted	10% DMSO	injury only	punctate
	100421	5	non-disrupted	10% DMSO	injury only	punctate
	100421	5	non-disrupted	10% DMSO	injury only	punctate
	100421	6	membrane disrupted	10% DMSO	injury only	punctate
	100421	6	membrane disrupted	10% DMSO	injury only	punctate
	100421	6	membrane disrupted	10% DMSO	injury only	punctate
	100421	6	membrane disrupted	10% DMSO	injury only	punctate
	100421	6	membrane disrupted	10% DMSO	injury only	diffuse
	100421	6	membrane disrupted	10% DMSO	injury only	diffuse
	100421	6	membrane disrupted	10% DMSO	injury only	diffuse
	100421	6	membrane disrupted	10% DMSO	injury only	diffuse
	100421	6	membrane disrupted	10% DMSO	injury only	diffuse
	100421	6	membrane disrupted	10% DMSO	injury only	diffuse
	100421	6	non-disrupted	10% DMSO	injury only	punctate
	100421	6	non-disrupted	10% DMSO	injury only	punctate
	100421	6	non-disrupted	10% DMSO	injury only	diffuse
	100421	6	non-disrupted	10% DMSO	injury only	diffuse
	100421	6	non-disrupted	10% DMSO	injury only	punctate
	100421	6	non-disrupted	10% DMSO	injury only	punctate
	22422	1	membrane disrupted	CA074Me	injury only	punctate
	22422	1	membrane disrupted	CA074Me	injury only	punctate
	22422	1	membrane disrupted	CA074Me	injury only	punctate
	22422	1	membrane disrupted	CA074Me	injury only	diffuse
	22422	1	membrane disrupted	CA074Me	injury only	diffuse
	22422	1	membrane disrupted	CA074Me	injury only	diffuse
	22422	1	membrane disrupted	CA074Me	injury only	diffuse
	22422	1	membrane disrupted	CA074Me	injury only	diffuse
	22422	1	membrane disrupted	CA074Me	injury only	diffuse
	22422	1	membrane disrupted	CA074Me	injury only	diffuse
	22422	1	non-disrupted	CA074Me	injury only	punctate
	22422	1	non-disrupted	CA074Me	injury only	punctate
	22422	1	non-disrupted	CA074Me	injury only	punctate
	22422	1	non-disrupted	CA074Me	injury only	diffuse
	22422	1	non-disrupted	CA074Me	injury only	diffuse
	22422	1	non-disrupted	CA074Me	injury only	diffuse
	22422	1	non-disrupted	CA074Me	injury only	diffuse
	22422	1	non-disrupted	CA074Me	injury only	diffuse
	22422	1	non-disrupted	CA074Me	injury only	diffuse
	22422	1	non-disrupted	CA074Me	injury only	diffuse
	22422	2	membrane disrupted	CA074Me	injury only	punctate
	22422	2	membrane disrupted	CA074Me	injury only	punctate
	22422	2	membrane disrupted	CA074Me	injury only	diffuse
	22422	2	membrane disrupted	CA074Me	injury only	diffuse
	22422	2	membrane disrupted	CA074Me	injury only	diffuse
	22422	2	membrane disrupted	CA074Me	injury only	diffuse
	22422	2	membrane disrupted	CA074Me	injury only	diffuse
	22422	2	membrane disrupted	CA074Me	injury only	diffuse
	22422	2	membrane disrupted	CA074Me	injury only	diffuse
	22422	2	membrane disrupted	CA074Me	injury only	diffuse
	22422	2	non-disrupted	CA074Me	injury only	punctate
	22422	2	non-disrupted	CA074Me	injury only	punctate
	22422	2	non-disrupted	CA074Me	injury only	punctate
	22422	2	non-disrupted	CA074Me	injury only	punctate
	22422	2	non-disrupted	CA074Me	injury only	punctate
	22422	2	non-disrupted	CA074Me	injury only	punctate
	22422	2	non-disrupted	CA074Me	injury only	diffuse
	22422	2	non-disrupted	CA074Me	injury only	diffuse
	22422	2	non-disrupted	CA074Me	injury only	diffuse
	22422	2	non-disrupted	CA074Me	injury only	diffuse
	22422	3	membrane disrupted	CA074Me	injury only	punctate
	22422	3	membrane disrupted	CA074Me	injury only	punctate
	22422	3	membrane disrupted	CA074Me	injury only	punctate
	22422	3	membrane disrupted	CA074Me	injury only	punctate
	22422	3	membrane disrupted	CA074Me	injury only	punctate
	22422	3	membrane disrupted	CA074Me	injury only	punctate
	22422	3	membrane disrupted	CA074Me	injury only	punctate
	22422	3	membrane disrupted	CA074Me	injury only	punctate
	22422	3	membrane disrupted	CA074Me	injury only	diffuse
	22422	3	membrane disrupted	CA074Me	injury only	diffuse
	22422	3	non-disrupted	CA074Me	injury only	punctate
	22422	3	non-disrupted	CA074Me	injury only	punctate
	22422	3	non-disrupted	CA074Me	injury only	punctate
	22422	3	non-disrupted	CA074Me	injury only	punctate
	22422	3	non-disrupted	CA074Me	injury only	punctate
	22422	3	non-disrupted	CA074Me	injury only	punctate
	22422	3	non-disrupted	CA074Me	injury only	diffuse
	22422	3	non-disrupted	CA074Me	injury only	diffuse
	22422	3	non-disrupted	CA074Me	injury only	diffuse
	22422	3	non-disrupted	CA074Me	injury only	diffuse
	22422	4	membrane disrupted	CA074Me	injury only	punctate
	22422	4	membrane disrupted	CA074Me	injury only	punctate
	22422	4	membrane disrupted	CA074Me	injury only	punctate
	22422	4	membrane disrupted	CA074Me	injury only	punctate
	22422	4	membrane disrupted	CA074Me	injury only	punctate
	22422	4	membrane disrupted	CA074Me	injury only	punctate
	22422	4	membrane disrupted	CA074Me	injury only	punctate
	22422	4	membrane disrupted	CA074Me	injury only	punctate
	22422	4	membrane disrupted	CA074Me	injury only	punctate
	22422	4	membrane disrupted	CA074Me	injury only	punctate
	22422	4	non-disrupted	CA074Me	injury only	punctate
	22422	4	non-disrupted	CA074Me	injury only	punctate
	22422	4	non-disrupted	CA074Me	injury only	punctate
	22422	4	non-disrupted	CA074Me	injury only	diffuse
	22422	4	non-disrupted	CA074Me	injury only	diffuse
	22422	4	non-disrupted	CA074Me	injury only	diffuse
	22422	4	non-disrupted	CA074Me	injury only	diffuse
	22422	4	non-disrupted	CA074Me	injury only	diffuse
	22422	4	non-disrupted	CA074Me	injury only	diffuse
	22422	4	non-disrupted	CA074Me	injury only	diffuse
	22422	5	membrane disrupted	CA074Me	injury only	punctate
	22422	5	membrane disrupted	CA074Me	injury only	punctate
	22422	5	membrane disrupted	CA074Me	injury only	punctate
	22422	5	membrane disrupted	CA074Me	injury only	punctate
	22422	5	membrane disrupted	CA074Me	injury only	punctate
	22422	5	membrane disrupted	CA074Me	injury only	punctate
	22422	5	membrane disrupted	CA074Me	injury only	punctate
	22422	5	membrane disrupted	CA074Me	injury only	punctate
	22422	5	membrane disrupted	CA074Me	injury only	punctate
	22422	5	membrane disrupted	CA074Me	injury only	diffuse
	22422	5	non-disrupted	CA074Me	injury only	diffuse
	22422	5	non-disrupted	CA074Me	injury only	diffuse
	22422	5	non-disrupted	CA074Me	injury only	diffuse
	22422	5	non-disrupted	CA074Me	injury only	diffuse
	22422	5	non-disrupted	CA074Me	injury only	diffuse
	80421	1	membrane disrupted	CA074Me	injury only	punctate
	80421	1	membrane disrupted	CA074Me	injury only	diffuse
	80421	1	membrane disrupted	CA074Me	injury only	diffuse
	80421	1	membrane disrupted	CA074Me	injury only	diffuse
	80421	1	non-disrupted	CA074Me	injury only	punctate
	80421	1	non-disrupted	CA074Me	injury only	punctate
	80421	1	non-disrupted	CA074Me	injury only	punctate
	80421	1	non-disrupted	CA074Me	injury only	punctate
	80421	1	non-disrupted	CA074Me	injury only	punctate
	80421	1	non-disrupted	CA074Me	injury only	punctate
	80421	1	non-disrupted	CA074Me	injury only	punctate
	80421	1	non-disrupted	CA074Me	injury only	punctate
	80421	1	non-disrupted	CA074Me	injury only	punctate
	80421	1	non-disrupted	CA074Me	injury only	punctate
	80421	2	membrane disrupted	CA074Me	injury only	punctate
	80421	2	membrane disrupted	CA074Me	injury only	punctate
	80421	2	non-disrupted	CA074Me	injury only	punctate
	80421	2	non-disrupted	CA074Me	injury only	punctate
	80421	2	non-disrupted	CA074Me	injury only	punctate
	80421	2	non-disrupted	CA074Me	injury only	punctate
	80421	2	non-disrupted	CA074Me	injury only	punctate
	80421	2	non-disrupted	CA074Me	injury only	punctate
	80421	2	non-disrupted	CA074Me	injury only	diffuse
	80421	2	non-disrupted	CA074Me	injury only	diffuse
	80421	2	non-disrupted	CA074Me	injury only	diffuse
	80421	2	non-disrupted	CA074Me	injury only	diffuse
	80421	3	membrane disrupted	CA074Me	injury only	punctate
	80421	3	membrane disrupted	CA074Me	injury only	punctate
	80421	3	membrane disrupted	CA074Me	injury only	punctate
	80421	3	membrane disrupted	CA074Me	injury only	punctate
	80421	3	membrane disrupted	CA074Me	injury only	punctate
	80421	3	membrane disrupted	CA074Me	injury only	punctate
	80421	3	membrane disrupted	CA074Me	injury only	diffuse
	80421	3	membrane disrupted	CA074Me	injury only	diffuse
	80421	3	membrane disrupted	CA074Me	injury only	diffuse
	80421	3	membrane disrupted	CA074Me	injury only	diffuse
	80421	3	non-disrupted	CA074Me	injury only	punctate
	80421	3	non-disrupted	CA074Me	injury only	punctate
	80421	3	non-disrupted	CA074Me	injury only	diffuse
	80421	3	non-disrupted	CA074Me	injury only	diffuse
	80421	3	non-disrupted	CA074Me	injury only	diffuse
	80421	3	non-disrupted	CA074Me	injury only	diffuse
	80421	3	non-disrupted	CA074Me	injury only	diffuse
	80421	3	non-disrupted	CA074Me	injury only	diffuse
	80421	3	non-disrupted	CA074Me	injury only	diffuse
	80421	3	non-disrupted	CA074Me	injury only	diffuse
	80421	4	membrane disrupted	CA074Me	injury only	punctate
	80421	4	membrane disrupted	CA074Me	injury only	punctate
	80421	4	membrane disrupted	CA074Me	injury only	punctate
	80421	4	membrane disrupted	CA074Me	injury only	diffuse
	80421	4	membrane disrupted	CA074Me	injury only	diffuse
	80421	4	membrane disrupted	CA074Me	injury only	diffuse
	80421	4	non-disrupted	CA074Me	injury only	punctate
	80421	4	non-disrupted	CA074Me	injury only	punctate
	80421	4	non-disrupted	CA074Me	injury only	punctate
	80421	4	non-disrupted	CA074Me	injury only	punctate
	80421	4	non-disrupted	CA074Me	injury only	punctate
	80421	4	non-disrupted	CA074Me	injury only	punctate
	80421	4	non-disrupted	CA074Me	injury only	punctate
	80421	4	non-disrupted	CA074Me	injury only	punctate
	80421	4	non-disrupted	CA074Me	injury only	punctate
	80421	4	non-disrupted	CA074Me	injury only	diffuse
	80421	5	membrane disrupted	CA074Me	injury only	diffuse
	80421	5	membrane disrupted	CA074Me	injury only	diffuse
	80421	5	membrane disrupted	CA074Me	injury only	diffuse
	80421	5	membrane disrupted	CA074Me	injury only	diffuse
	80421	5	non-disrupted	CA074Me	injury only	punctate
	80421	5	non-disrupted	CA074Me	injury only	punctate
	80421	5	non-disrupted	CA074Me	injury only	punctate
	80421	5	non-disrupted	CA074Me	injury only	punctate
	80421	5	non-disrupted	CA074Me	injury only	punctate
	80421	5	non-disrupted	CA074Me	injury only	punctate
	80421	5	non-disrupted	CA074Me	injury only	punctate
	80421	5	non-disrupted	CA074Me	injury only	diffuse
	80421	5	non-disrupted	CA074Me	injury only	diffuse
	80421	5	non-disrupted	CA074Me	injury only	diffuse
	100621	1	membrane disrupted	CA074Me	injury only	diffuse
	100621	1	membrane disrupted	CA074Me	injury only	diffuse
	100621	1	membrane disrupted	CA074Me	injury only	diffuse
	100621	1	membrane disrupted	CA074Me	injury only	diffuse
	100621	1	non-disrupted	CA074Me	injury only	punctate
	100621	1	non-disrupted	CA074Me	injury only	punctate
	100621	1	non-disrupted	CA074Me	injury only	punctate
	100621	1	non-disrupted	CA074Me	injury only	punctate
	100621	1	non-disrupted	CA074Me	injury only	punctate
	100621	1	non-disrupted	CA074Me	injury only	punctate
	100621	1	non-disrupted	CA074Me	injury only	diffuse
	100621	1	non-disrupted	CA074Me	injury only	diffuse
	100621	1	non-disrupted	CA074Me	injury only	diffuse
	100621	1	non-disrupted	CA074Me	injury only	diffuse
	100621	2	non-disrupted	CA074Me	injury only	punctate
	100621	2	non-disrupted	CA074Me	injury only	diffuse
	100621	2	non-disrupted	CA074Me	injury only	diffuse
	100621	2	non-disrupted	CA074Me	injury only	diffuse
	100621	2	non-disrupted	CA074Me	injury only	diffuse
	100621	2	non-disrupted	CA074Me	injury only	diffuse
	100621	2	non-disrupted	CA074Me	injury only	diffuse
	100621	2	non-disrupted	CA074Me	injury only	diffuse
	100621	2	non-disrupted	CA074Me	injury only	diffuse
	100621	2	non-disrupted	CA074Me	injury only	diffuse
	100621	3	membrane disrupted	CA074Me	injury only	punctate
	100621	3	membrane disrupted	CA074Me	injury only	punctate
	100621	3	membrane disrupted	CA074Me	injury only	diffuse
	100621	3	membrane disrupted	CA074Me	injury only	diffuse
	100621	3	membrane disrupted	CA074Me	injury only	diffuse
	100621	3	membrane disrupted	CA074Me	injury only	diffuse
	100621	3	membrane disrupted	CA074Me	injury only	diffuse
	100621	3	membrane disrupted	CA074Me	injury only	diffuse
	100621	3	membrane disrupted	CA074Me	injury only	diffuse
	100621	3	membrane disrupted	CA074Me	injury only	diffuse
	100621	3	non-disrupted	CA074Me	injury only	punctate
	100621	3	non-disrupted	CA074Me	injury only	punctate
	100621	3	non-disrupted	CA074Me	injury only	diffuse
	100621	3	non-disrupted	CA074Me	injury only	diffuse
	100621	3	non-disrupted	CA074Me	injury only	diffuse
	100621	3	non-disrupted	CA074Me	injury only	diffuse
	100621	3	non-disrupted	CA074Me	injury only	diffuse
	100621	3	non-disrupted	CA074Me	injury only	diffuse
	100621	3	non-disrupted	CA074Me	injury only	diffuse
	100621	3	non-disrupted	CA074Me	injury only	diffuse
	100621	4	non-disrupted	CA074Me	injury only	punctate
	100621	4	non-disrupted	CA074Me	injury only	punctate
	100621	4	non-disrupted	CA074Me	injury only	punctate
	100621	4	non-disrupted	CA074Me	injury only	punctate
	100621	4	non-disrupted	CA074Me	injury only	punctate
	100621	4	non-disrupted	CA074Me	injury only	diffuse
	100621	4	non-disrupted	CA074Me	injury only	diffuse
	100621	4	non-disrupted	CA074Me	injury only	diffuse
	100621	4	non-disrupted	CA074Me	injury only	diffuse
	100621	4	non-disrupted	CA074Me	injury only	diffuse
	100621	5	membrane disrupted	CA074Me	injury only	punctate
	100621	5	membrane disrupted	CA074Me	injury only	punctate
	100621	5	membrane disrupted	CA074Me	injury only	diffuse
	100621	5	membrane disrupted	CA074Me	injury only	diffuse
	100621	5	membrane disrupted	CA074Me	injury only	diffuse
	100621	5	membrane disrupted	CA074Me	injury only	diffuse
	100621	5	membrane disrupted	CA074Me	injury only	diffuse
	100621	5	non-disrupted	CA074Me	injury only	punctate
	100621	5	non-disrupted	CA074Me	injury only	punctate
	100621	5	non-disrupted	CA074Me	injury only	punctate
	100621	5	non-disrupted	CA074Me	injury only	punctate
	100621	5	non-disrupted	CA074Me	injury only	punctate
	100621	5	non-disrupted	CA074Me	injury only	punctate
	100621	5	non-disrupted	CA074Me	injury only	diffuse
	100621	5	non-disrupted	CA074Me	injury only	diffuse
	42222	1	membrane disrupted	CA074Me	injury only	punctate
	42222	1	membrane disrupted	CA074Me	injury only	punctate
	42222	1	membrane disrupted	CA074Me	injury only	punctate
	42222	1	membrane disrupted	CA074Me	injury only	diffuse
	42222	1	membrane disrupted	CA074Me	injury only	diffuse
	42222	1	membrane disrupted	CA074Me	injury only	diffuse
	42222	1	membrane disrupted	CA074Me	injury only	diffuse
	42222	1	membrane disrupted	CA074Me	injury only	diffuse
	42222	1	membrane disrupted	CA074Me	injury only	diffuse
	42222	1	membrane disrupted	CA074Me	injury only	diffuse
	42222	1	non-disrupted	CA074Me	injury only	punctate
	42222	1	non-disrupted	CA074Me	injury only	punctate
	42222	1	non-disrupted	CA074Me	injury only	punctate
	42222	1	non-disrupted	CA074Me	injury only	punctate
	42222	1	non-disrupted	CA074Me	injury only	punctate
	42222	1	non-disrupted	CA074Me	injury only	diffuse
	42222	1	non-disrupted	CA074Me	injury only	diffuse
	42222	1	non-disrupted	CA074Me	injury only	diffuse
	42222	1	non-disrupted	CA074Me	injury only	diffuse
	42222	1	non-disrupted	CA074Me	injury only	diffuse
	42222	2	membrane disrupted	CA074Me	injury only	punctate
	42222	2	membrane disrupted	CA074Me	injury only	punctate
	42222	2	membrane disrupted	CA074Me	injury only	diffuse
	42222	2	membrane disrupted	CA074Me	injury only	diffuse
	42222	2	membrane disrupted	CA074Me	injury only	diffuse
	42222	2	membrane disrupted	CA074Me	injury only	diffuse
	42222	2	membrane disrupted	CA074Me	injury only	diffuse
	42222	2	membrane disrupted	CA074Me	injury only	diffuse
	42222	2	membrane disrupted	CA074Me	injury only	diffuse
	42222	2	membrane disrupted	CA074Me	injury only	diffuse
	42222	2	non-disrupted	CA074Me	injury only	punctate
	42222	2	non-disrupted	CA074Me	injury only	punctate
	42222	2	non-disrupted	CA074Me	injury only	punctate
	42222	2	non-disrupted	CA074Me	injury only	punctate
	42222	2	non-disrupted	CA074Me	injury only	punctate
	42222	2	non-disrupted	CA074Me	injury only	punctate
	42222	2	non-disrupted	CA074Me	injury only	punctate
	42222	2	non-disrupted	CA074Me	injury only	punctate
	42222	2	non-disrupted	CA074Me	injury only	punctate
	42222	2	non-disrupted	CA074Me	injury only	diffuse
	42222	3	membrane disrupted	CA074Me	injury only	punctate
	42222	3	non-disrupted	CA074Me	injury only	punctate
	42222	3	non-disrupted	CA074Me	injury only	punctate
	42222	3	non-disrupted	CA074Me	injury only	punctate
	42222	3	non-disrupted	CA074Me	injury only	punctate
	42222	3	non-disrupted	CA074Me	injury only	punctate
	42222	3	non-disrupted	CA074Me	injury only	punctate
	42222	3	non-disrupted	CA074Me	injury only	punctate
	42222	3	non-disrupted	CA074Me	injury only	punctate
	42222	3	non-disrupted	CA074Me	injury only	punctate
	42222	3	non-disrupted	CA074Me	injury only	diffuse
	42222	4	membrane disrupted	CA074Me	injury only	punctate
	42222	4	membrane disrupted	CA074Me	injury only	punctate
	42222	4	membrane disrupted	CA074Me	injury only	punctate
	42222	4	membrane disrupted	CA074Me	injury only	punctate
	42222	4	membrane disrupted	CA074Me	injury only	punctate
	42222	4	membrane disrupted	CA074Me	injury only	punctate
	42222	4	membrane disrupted	CA074Me	injury only	punctate
	42222	4	membrane disrupted	CA074Me	injury only	punctate
	42222	4	membrane disrupted	CA074Me	injury only	punctate
	42222	4	membrane disrupted	CA074Me	injury only	diffuse
	42222	4	non-disrupted	CA074Me	injury only	diffuse
	42222	4	non-disrupted	CA074Me	injury only	diffuse
	42222	4	non-disrupted	CA074Me	injury only	diffuse
	42222	4	non-disrupted	CA074Me	injury only	diffuse
	42222	4	non-disrupted	CA074Me	injury only	diffuse
	42222	4	non-disrupted	CA074Me	injury only	diffuse
	42222	4	non-disrupted	CA074Me	injury only	diffuse
	42222	5	membrane disrupted	CA074Me	injury only	punctate
	42222	5	membrane disrupted	CA074Me	injury only	punctate
	42222	5	membrane disrupted	CA074Me	injury only	punctate
	42222	5	membrane disrupted	CA074Me	injury only	punctate
	42222	5	membrane disrupted	CA074Me	injury only	diffuse
	42222	5	membrane disrupted	CA074Me	injury only	diffuse
	42222	5	membrane disrupted	CA074Me	injury only	diffuse
	42222	5	membrane disrupted	CA074Me	injury only	diffuse
	42222	5	membrane disrupted	CA074Me	injury only	diffuse
	42222	5	membrane disrupted	CA074Me	injury only	diffuse
	42222	5	non-disrupted	CA074Me	injury only	punctate
	42222	5	non-disrupted	CA074Me	injury only	punctate
	42222	5	non-disrupted	CA074Me	injury only	punctate
	42222	5	non-disrupted	CA074Me	injury only	punctate
	42222	5	non-disrupted	CA074Me	injury only	punctate
	42222	5	non-disrupted	CA074Me	injury only	punctate
	42222	5	non-disrupted	CA074Me	injury only	punctate
	42222	5	non-disrupted	CA074Me	injury only	punctate
	42222	5	non-disrupted	CA074Me	injury only	punctate
	42222	5	non-disrupted	CA074Me	injury only	diffuse
	52121	1	membrane disrupted	CA074Me	injury only	punctate
	52121	1	membrane disrupted	CA074Me	injury only	diffuse
	52121	1	membrane disrupted	CA074Me	injury only	diffuse
	52121	1	membrane disrupted	CA074Me	injury only	diffuse
	52121	1	membrane disrupted	CA074Me	injury only	diffuse
	52121	1	membrane disrupted	CA074Me	injury only	diffuse
	52121	1	membrane disrupted	CA074Me	injury only	diffuse
	52121	1	membrane disrupted	CA074Me	injury only	diffuse
	52121	1	membrane disrupted	CA074Me	injury only	diffuse
	52121	1	membrane disrupted	CA074Me	injury only	diffuse
	52121	1	non-disrupted	CA074Me	injury only	punctate
	52121	1	non-disrupted	CA074Me	injury only	punctate
	52121	1	non-disrupted	CA074Me	injury only	punctate
	52121	1	non-disrupted	CA074Me	injury only	punctate
	52121	1	non-disrupted	CA074Me	injury only	punctate
	52121	1	non-disrupted	CA074Me	injury only	punctate
	52121	1	non-disrupted	CA074Me	injury only	diffuse
	52121	1	non-disrupted	CA074Me	injury only	diffuse
	52121	2	membrane disrupted	CA074Me	injury only	punctate
	52121	2	membrane disrupted	CA074Me	injury only	diffuse
	52121	2	membrane disrupted	CA074Me	injury only	diffuse
	52121	2	membrane disrupted	CA074Me	injury only	diffuse
	52121	2	membrane disrupted	CA074Me	injury only	diffuse
	52121	2	membrane disrupted	CA074Me	injury only	diffuse
	52121	2	membrane disrupted	CA074Me	injury only	diffuse
	52121	2	membrane disrupted	CA074Me	injury only	diffuse
	52121	2	membrane disrupted	CA074Me	injury only	diffuse
	52121	2	membrane disrupted	CA074Me	injury only	diffuse
	52121	2	non-disrupted	CA074Me	injury only	punctate
	52121	2	non-disrupted	CA074Me	injury only	punctate
	52121	2	non-disrupted	CA074Me	injury only	punctate
	52121	2	non-disrupted	CA074Me	injury only	punctate
	52121	2	non-disrupted	CA074Me	injury only	punctate
	52121	2	non-disrupted	CA074Me	injury only	punctate
	52121	2	non-disrupted	CA074Me	injury only	punctate
	52121	2	non-disrupted	CA074Me	injury only	punctate
	52121	2	non-disrupted	CA074Me	injury only	diffuse
	52121	2	non-disrupted	CA074Me	injury only	diffuse
	52121	3	membrane disrupted	CA074Me	injury only	diffuse
	52121	3	membrane disrupted	CA074Me	injury only	diffuse
	52121	3	membrane disrupted	CA074Me	injury only	diffuse
	52121	3	membrane disrupted	CA074Me	injury only	diffuse
	52121	3	membrane disrupted	CA074Me	injury only	diffuse
	52121	3	membrane disrupted	CA074Me	injury only	diffuse
	52121	3	membrane disrupted	CA074Me	injury only	diffuse
	52121	3	membrane disrupted	CA074Me	injury only	diffuse
	52121	3	membrane disrupted	CA074Me	injury only	diffuse
	52121	3	membrane disrupted	CA074Me	injury only	diffuse
	52121	3	non-disrupted	CA074Me	injury only	punctate
	52121	3	non-disrupted	CA074Me	injury only	punctate
	52121	3	non-disrupted	CA074Me	injury only	punctate
	52121	3	non-disrupted	CA074Me	injury only	punctate
	52121	3	non-disrupted	CA074Me	injury only	punctate
	52121	3	non-disrupted	CA074Me	injury only	punctate
	52121	3	non-disrupted	CA074Me	injury only	diffuse
	52121	3	non-disrupted	CA074Me	injury only	diffuse
	52121	3	non-disrupted	CA074Me	injury only	diffuse
	52121	3	non-disrupted	CA074Me	injury only	diffuse
	52121	4	membrane disrupted	CA074Me	injury only	diffuse
	52121	4	membrane disrupted	CA074Me	injury only	diffuse
	52121	4	membrane disrupted	CA074Me	injury only	diffuse
	52121	4	membrane disrupted	CA074Me	injury only	diffuse
	52121	4	membrane disrupted	CA074Me	injury only	diffuse
	52121	4	membrane disrupted	CA074Me	injury only	diffuse
	52121	4	membrane disrupted	CA074Me	injury only	diffuse
	52121	4	membrane disrupted	CA074Me	injury only	diffuse
	52121	4	membrane disrupted	CA074Me	injury only	diffuse
	52121	4	membrane disrupted	CA074Me	injury only	diffuse
	52121	4	non-disrupted	CA074Me	injury only	punctate
	52121	4	non-disrupted	CA074Me	injury only	punctate
	52121	4	non-disrupted	CA074Me	injury only	punctate
	52121	4	non-disrupted	CA074Me	injury only	punctate
	52121	4	non-disrupted	CA074Me	injury only	punctate
	52121	4	non-disrupted	CA074Me	injury only	punctate
	52121	4	non-disrupted	CA074Me	injury only	punctate
	52121	4	non-disrupted	CA074Me	injury only	punctate
	52121	4	non-disrupted	CA074Me	injury only	punctate
	52121	4	non-disrupted	CA074Me	injury only	diffuse
	52121	5	membrane disrupted	CA074Me	injury only	diffuse
	52121	5	membrane disrupted	CA074Me	injury only	diffuse
	52121	5	membrane disrupted	CA074Me	injury only	diffuse
	52121	5	membrane disrupted	CA074Me	injury only	diffuse
	52121	5	membrane disrupted	CA074Me	injury only	diffuse
	52121	5	membrane disrupted	CA074Me	injury only	diffuse
	52121	5	membrane disrupted	CA074Me	injury only	diffuse
	52121	5	membrane disrupted	CA074Me	injury only	diffuse
	52121	5	membrane disrupted	CA074Me	injury only	diffuse
	52121	5	non-disrupted	CA074Me	injury only	punctate
	52121	5	non-disrupted	CA074Me	injury only	punctate
	52121	5	non-disrupted	CA074Me	injury only	punctate
	52121	5	non-disrupted	CA074Me	injury only	punctate
	52121	5	non-disrupted	CA074Me	injury only	punctate
	52121	5	non-disrupted	CA074Me	injury only	punctate
	52121	5	non-disrupted	CA074Me	injury only	punctate
	52121	5	non-disrupted	CA074Me	injury only	diffuse
	52121	5	non-disrupted	CA074Me	injury only	diffuse
	71922	1	membrane disrupted	CA074Me	injury only	punctate
	71922	1	membrane disrupted	CA074Me	injury only	punctate
	71922	1	non-disrupted	CA074Me	injury only	punctate
	71922	1	non-disrupted	CA074Me	injury only	punctate
	71922	1	non-disrupted	CA074Me	injury only	punctate
	71922	2	membrane disrupted	CA074Me	injury only	diffuse
	71922	2	membrane disrupted	CA074Me	injury only	diffuse
	71922	2	membrane disrupted	CA074Me	injury only	diffuse
	71922	2	membrane disrupted	CA074Me	injury only	diffuse
	71922	2	non-disrupted	CA074Me	injury only	punctate
	71922	2	non-disrupted	CA074Me	injury only	diffuse
	71922	2	non-disrupted	CA074Me	injury only	diffuse
	71922	2	non-disrupted	CA074Me	injury only	diffuse
	71922	2	non-disrupted	CA074Me	injury only	diffuse
	71922	2	non-disrupted	CA074Me	injury only	diffuse
	71922	2	non-disrupted	CA074Me	injury only	diffuse
	71922	2	non-disrupted	CA074Me	injury only	diffuse
	71922	2	non-disrupted	CA074Me	injury only	diffuse
	71922	2	non-disrupted	CA074Me	injury only	diffuse
	71922	3	membrane disrupted	CA074Me	injury only	punctate
	71922	3	membrane disrupted	CA074Me	injury only	diffuse
	71922	3	non-disrupted	CA074Me	injury only	diffuse
	71922	3	non-disrupted	CA074Me	injury only	diffuse
	71922	3	non-disrupted	CA074Me	injury only	diffuse
	71922	3	non-disrupted	CA074Me	injury only	diffuse
	71922	3	non-disrupted	CA074Me	injury only	diffuse
	71922	3	non-disrupted	CA074Me	injury only	diffuse
	71922	3	non-disrupted	CA074Me	injury only	diffuse
	71922	3	non-disrupted	CA074Me	injury only	diffuse
	71922	3	non-disrupted	CA074Me	injury only	diffuse
	71922	3	non-disrupted	CA074Me	injury only	diffuse
	71922	4	non-disrupted	CA074Me	injury only	diffuse
	71922	4	non-disrupted	CA074Me	injury only	diffuse
	71922	4	non-disrupted	CA074Me	injury only	diffuse
	71922	4	non-disrupted	CA074Me	injury only	diffuse
	71922	4	non-disrupted	CA074Me	injury only	diffuse
	71922	4	non-disrupted	CA074Me	injury only	diffuse
	71922	4	non-disrupted	CA074Me	injury only	diffuse
	71922	4	non-disrupted	CA074Me	injury only	diffuse
	71922	4	non-disrupted	CA074Me	injury only	diffuse
	71922	4	non-disrupted	CA074Me	injury only	diffuse
	71922	5	membrane disrupted	CA074Me	injury only	punctate
	71922	5	membrane disrupted	CA074Me	injury only	punctate
	71922	5	membrane disrupted	CA074Me	injury only	punctate
	71922	5	membrane disrupted	CA074Me	injury only	punctate
	71922	5	membrane disrupted	CA074Me	injury only	punctate
	71922	5	membrane disrupted	CA074Me	injury only	punctate
	71922	5	membrane disrupted	CA074Me	injury only	punctate
	71922	5	membrane disrupted	CA074Me	injury only	diffuse
	71922	5	membrane disrupted	CA074Me	injury only	diffuse
	71922	5	membrane disrupted	CA074Me	injury only	diffuse
	71922	5	non-disrupted	CA074Me	injury only	punctate
	71922	5	non-disrupted	CA074Me	injury only	punctate
	71922	5	non-disrupted	CA074Me	injury only	punctate
	71922	5	non-disrupted	CA074Me	injury only	punctate
	71922	5	non-disrupted	CA074Me	injury only	punctate
	22222	1	membrane disrupted	10% DMSO	injury+ICP elevation	diffuse
	22222	1	non-disrupted	10% DMSO	injury+ICP elevation	punctate
	22222	1	non-disrupted	10% DMSO	injury+ICP elevation	punctate
	22222	1	non-disrupted	10% DMSO	injury+ICP elevation	diffuse
	22222	1	non-disrupted	10% DMSO	injury+ICP elevation	diffuse
	22222	1	non-disrupted	10% DMSO	injury+ICP elevation	diffuse
	22222	1	non-disrupted	10% DMSO	injury+ICP elevation	diffuse
	22222	1	non-disrupted	10% DMSO	injury+ICP elevation	diffuse
	22222	1	non-disrupted	10% DMSO	injury+ICP elevation	diffuse
	22222	1	non-disrupted	10% DMSO	injury+ICP elevation	diffuse
	22222	1	non-disrupted	10% DMSO	injury+ICP elevation	diffuse
	22222	2	non-disrupted	10% DMSO	injury+ICP elevation	punctate
	22222	2	non-disrupted	10% DMSO	injury+ICP elevation	punctate
	22222	2	non-disrupted	10% DMSO	injury+ICP elevation	punctate
	22222	2	non-disrupted	10% DMSO	injury+ICP elevation	punctate
	22222	2	non-disrupted	10% DMSO	injury+ICP elevation	punctate
	22222	2	non-disrupted	10% DMSO	injury+ICP elevation	punctate
	22222	2	non-disrupted	10% DMSO	injury+ICP elevation	punctate
	22222	2	non-disrupted	10% DMSO	injury+ICP elevation	diffuse
	22222	2	non-disrupted	10% DMSO	injury+ICP elevation	diffuse
	22222	2	non-disrupted	10% DMSO	injury+ICP elevation	diffuse
	22222	3	membrane disrupted	10% DMSO	injury+ICP elevation	punctate
	22222	3	membrane disrupted	10% DMSO	injury+ICP elevation	punctate
	22222	3	membrane disrupted	10% DMSO	injury+ICP elevation	punctate
	22222	3	membrane disrupted	10% DMSO	injury+ICP elevation	punctate
	22222	3	membrane disrupted	10% DMSO	injury+ICP elevation	punctate
	22222	3	membrane disrupted	10% DMSO	injury+ICP elevation	punctate
	22222	3	membrane disrupted	10% DMSO	injury+ICP elevation	diffuse
	22222	3	membrane disrupted	10% DMSO	injury+ICP elevation	diffuse
	22222	3	membrane disrupted	10% DMSO	injury+ICP elevation	diffuse
	22222	3	membrane disrupted	10% DMSO	injury+ICP elevation	diffuse
	22222	3	non-disrupted	10% DMSO	injury+ICP elevation	punctate
	22222	3	non-disrupted	10% DMSO	injury+ICP elevation	punctate
	22222	3	non-disrupted	10% DMSO	injury+ICP elevation	punctate
	22222	3	non-disrupted	10% DMSO	injury+ICP elevation	diffuse
	22222	3	non-disrupted	10% DMSO	injury+ICP elevation	diffuse
	22222	3	non-disrupted	10% DMSO	injury+ICP elevation	diffuse
	22222	3	non-disrupted	10% DMSO	injury+ICP elevation	diffuse
	22222	3	non-disrupted	10% DMSO	injury+ICP elevation	diffuse
	22222	3	non-disrupted	10% DMSO	injury+ICP elevation	diffuse
	22222	3	non-disrupted	10% DMSO	injury+ICP elevation	diffuse
	22222	4	membrane disrupted	10% DMSO	injury+ICP elevation	punctate
	22222	4	membrane disrupted	10% DMSO	injury+ICP elevation	punctate
	22222	4	membrane disrupted	10% DMSO	injury+ICP elevation	punctate
	22222	4	membrane disrupted	10% DMSO	injury+ICP elevation	punctate
	22222	4	membrane disrupted	10% DMSO	injury+ICP elevation	punctate
	22222	4	membrane disrupted	10% DMSO	injury+ICP elevation	punctate
	22222	4	membrane disrupted	10% DMSO	injury+ICP elevation	punctate
	22222	4	membrane disrupted	10% DMSO	injury+ICP elevation	punctate
	22222	4	membrane disrupted	10% DMSO	injury+ICP elevation	punctate
	22222	4	membrane disrupted	10% DMSO	injury+ICP elevation	diffuse
	22222	4	non-disrupted	10% DMSO	injury+ICP elevation	punctate
	22222	4	non-disrupted	10% DMSO	injury+ICP elevation	punctate
	22222	4	non-disrupted	10% DMSO	injury+ICP elevation	punctate
	22222	4	non-disrupted	10% DMSO	injury+ICP elevation	diffuse
	22222	4	non-disrupted	10% DMSO	injury+ICP elevation	diffuse
	22222	5	membrane disrupted	10% DMSO	injury+ICP elevation	diffuse
	22222	5	membrane disrupted	10% DMSO	injury+ICP elevation	diffuse
	22222	5	membrane disrupted	10% DMSO	injury+ICP elevation	diffuse
	22222	5	membrane disrupted	10% DMSO	injury+ICP elevation	diffuse
	22222	5	membrane disrupted	10% DMSO	injury+ICP elevation	diffuse
	22222	5	membrane disrupted	10% DMSO	injury+ICP elevation	diffuse
	22222	5	membrane disrupted	10% DMSO	injury+ICP elevation	diffuse
	22222	5	membrane disrupted	10% DMSO	injury+ICP elevation	diffuse
	22222	5	membrane disrupted	10% DMSO	injury+ICP elevation	punctate
	22222	5	membrane disrupted	10% DMSO	injury+ICP elevation	punctate
	22222	5	non-disrupted	10% DMSO	injury+ICP elevation	diffuse
	22222	5	non-disrupted	10% DMSO	injury+ICP elevation	diffuse
	22222	5	non-disrupted	10% DMSO	injury+ICP elevation	diffuse
	22222	5	non-disrupted	10% DMSO	injury+ICP elevation	diffuse
	22222	5	non-disrupted	10% DMSO	injury+ICP elevation	diffuse
	22222	5	non-disrupted	10% DMSO	injury+ICP elevation	diffuse
	22222	5	non-disrupted	10% DMSO	injury+ICP elevation	diffuse
	22222	5	non-disrupted	10% DMSO	injury+ICP elevation	punctate
	30421	1	membrane disrupted	10% DMSO	injury+ICP elevation	diffuse
	30421	1	membrane disrupted	10% DMSO	injury+ICP elevation	diffuse
	30421	1	non-disrupted	10% DMSO	injury+ICP elevation	punctate
	30421	1	non-disrupted	10% DMSO	injury+ICP elevation	punctate
	30421	1	non-disrupted	10% DMSO	injury+ICP elevation	punctate
	30421	1	non-disrupted	10% DMSO	injury+ICP elevation	punctate
	30421	1	non-disrupted	10% DMSO	injury+ICP elevation	punctate
	30421	1	non-disrupted	10% DMSO	injury+ICP elevation	punctate
	30421	1	non-disrupted	10% DMSO	injury+ICP elevation	punctate
	30421	1	non-disrupted	10% DMSO	injury+ICP elevation	punctate
	30421	1	non-disrupted	10% DMSO	injury+ICP elevation	diffuse
	30421	1	non-disrupted	10% DMSO	injury+ICP elevation	diffuse
	30421	2	membrane disrupted	10% DMSO	injury+ICP elevation	punctate
	30421	2	membrane disrupted	10% DMSO	injury+ICP elevation	diffuse
	30421	2	membrane disrupted	10% DMSO	injury+ICP elevation	diffuse
	30421	2	membrane disrupted	10% DMSO	injury+ICP elevation	diffuse
	30421	2	membrane disrupted	10% DMSO	injury+ICP elevation	diffuse
	30421	2	non-disrupted	10% DMSO	injury+ICP elevation	punctate
	30421	2	non-disrupted	10% DMSO	injury+ICP elevation	punctate
	30421	2	non-disrupted	10% DMSO	injury+ICP elevation	punctate
	30421	2	non-disrupted	10% DMSO	injury+ICP elevation	punctate
	30421	2	non-disrupted	10% DMSO	injury+ICP elevation	punctate
	30421	2	non-disrupted	10% DMSO	injury+ICP elevation	punctate
	30421	2	non-disrupted	10% DMSO	injury+ICP elevation	punctate
	30421	2	non-disrupted	10% DMSO	injury+ICP elevation	punctate
	30421	2	non-disrupted	10% DMSO	injury+ICP elevation	diffuse
	30421	2	non-disrupted	10% DMSO	injury+ICP elevation	diffuse
	30421	3	membrane disrupted	10% DMSO	injury+ICP elevation	punctate
	30421	3	membrane disrupted	10% DMSO	injury+ICP elevation	diffuse
	30421	3	membrane disrupted	10% DMSO	injury+ICP elevation	diffuse
	30421	3	membrane disrupted	10% DMSO	injury+ICP elevation	diffuse
	30421	3	membrane disrupted	10% DMSO	injury+ICP elevation	diffuse
	30421	3	membrane disrupted	10% DMSO	injury+ICP elevation	diffuse
	30421	3	membrane disrupted	10% DMSO	injury+ICP elevation	diffuse
	30421	3	membrane disrupted	10% DMSO	injury+ICP elevation	diffuse
	30421	3	membrane disrupted	10% DMSO	injury+ICP elevation	diffuse
	30421	3	membrane disrupted	10% DMSO	injury+ICP elevation	diffuse
	30421	3	non-disrupted	10% DMSO	injury+ICP elevation	punctate
	30421	3	non-disrupted	10% DMSO	injury+ICP elevation	punctate
	30421	3	non-disrupted	10% DMSO	injury+ICP elevation	punctate
	30421	3	non-disrupted	10% DMSO	injury+ICP elevation	punctate
	30421	3	non-disrupted	10% DMSO	injury+ICP elevation	punctate
	30421	3	non-disrupted	10% DMSO	injury+ICP elevation	punctate
	30421	3	non-disrupted	10% DMSO	injury+ICP elevation	diffuse
	30421	3	non-disrupted	10% DMSO	injury+ICP elevation	diffuse
	30421	3	non-disrupted	10% DMSO	injury+ICP elevation	diffuse
	30421	3	non-disrupted	10% DMSO	injury+ICP elevation	diffuse
	30421	4	membrane disrupted	10% DMSO	injury+ICP elevation	punctate
	30421	4	membrane disrupted	10% DMSO	injury+ICP elevation	punctate
	30421	4	membrane disrupted	10% DMSO	injury+ICP elevation	punctate
	30421	4	membrane disrupted	10% DMSO	injury+ICP elevation	punctate
	30421	4	membrane disrupted	10% DMSO	injury+ICP elevation	diffuse
	30421	4	non-disrupted	10% DMSO	injury+ICP elevation	punctate
	30421	4	non-disrupted	10% DMSO	injury+ICP elevation	punctate
	30421	4	non-disrupted	10% DMSO	injury+ICP elevation	punctate
	30421	4	non-disrupted	10% DMSO	injury+ICP elevation	punctate
	30421	4	non-disrupted	10% DMSO	injury+ICP elevation	punctate
	30421	4	non-disrupted	10% DMSO	injury+ICP elevation	punctate
	30421	4	non-disrupted	10% DMSO	injury+ICP elevation	punctate
	30421	4	non-disrupted	10% DMSO	injury+ICP elevation	punctate
	30421	4	non-disrupted	10% DMSO	injury+ICP elevation	punctate
	30421	4	non-disrupted	10% DMSO	injury+ICP elevation	punctate
	30421	5	membrane disrupted	10% DMSO	injury+ICP elevation	punctate
	30421	5	membrane disrupted	10% DMSO	injury+ICP elevation	punctate
	30421	5	membrane disrupted	10% DMSO	injury+ICP elevation	punctate
	30421	5	membrane disrupted	10% DMSO	injury+ICP elevation	punctate
	30421	5	non-disrupted	10% DMSO	injury+ICP elevation	punctate
	30421	5	non-disrupted	10% DMSO	injury+ICP elevation	punctate
	30421	5	non-disrupted	10% DMSO	injury+ICP elevation	punctate
	30421	5	non-disrupted	10% DMSO	injury+ICP elevation	punctate
	30421	5	non-disrupted	10% DMSO	injury+ICP elevation	punctate
	30421	5	non-disrupted	10% DMSO	injury+ICP elevation	punctate
	30421	5	non-disrupted	10% DMSO	injury+ICP elevation	punctate
	30421	5	non-disrupted	10% DMSO	injury+ICP elevation	punctate
	30421	5	non-disrupted	10% DMSO	injury+ICP elevation	punctate
	30421	5	non-disrupted	10% DMSO	injury+ICP elevation	punctate
	72821	1	membrane disrupted	10% DMSO	injury+ICP elevation	punctate
	72821	1	membrane disrupted	10% DMSO	injury+ICP elevation	diffuse
	72821	1	membrane disrupted	10% DMSO	injury+ICP elevation	diffuse
	72821	1	membrane disrupted	10% DMSO	injury+ICP elevation	diffuse
	72821	1	non-disrupted	10% DMSO	injury+ICP elevation	punctate
	72821	1	non-disrupted	10% DMSO	injury+ICP elevation	punctate
	72821	1	non-disrupted	10% DMSO	injury+ICP elevation	punctate
	72821	1	non-disrupted	10% DMSO	injury+ICP elevation	punctate
	72821	1	non-disrupted	10% DMSO	injury+ICP elevation	punctate
	72821	1	non-disrupted	10% DMSO	injury+ICP elevation	punctate
	72821	1	non-disrupted	10% DMSO	injury+ICP elevation	punctate
	72821	1	non-disrupted	10% DMSO	injury+ICP elevation	punctate
	72821	1	non-disrupted	10% DMSO	injury+ICP elevation	diffuse
	72821	1	non-disrupted	10% DMSO	injury+ICP elevation	diffuse
	72821	2	membrane disrupted	10% DMSO	injury+ICP elevation	diffuse
	72821	2	non-disrupted	10% DMSO	injury+ICP elevation	punctate
	72821	2	non-disrupted	10% DMSO	injury+ICP elevation	punctate
	72821	2	non-disrupted	10% DMSO	injury+ICP elevation	punctate
	72821	2	non-disrupted	10% DMSO	injury+ICP elevation	punctate
	72821	2	non-disrupted	10% DMSO	injury+ICP elevation	punctate
	72821	2	non-disrupted	10% DMSO	injury+ICP elevation	punctate
	72821	2	non-disrupted	10% DMSO	injury+ICP elevation	punctate
	72821	2	non-disrupted	10% DMSO	injury+ICP elevation	punctate
	72821	2	non-disrupted	10% DMSO	injury+ICP elevation	punctate
	72821	2	non-disrupted	10% DMSO	injury+ICP elevation	punctate
	72821	3	membrane disrupted	10% DMSO	injury+ICP elevation	punctate
	72821	3	membrane disrupted	10% DMSO	injury+ICP elevation	punctate
	72821	3	membrane disrupted	10% DMSO	injury+ICP elevation	diffuse
	72821	3	membrane disrupted	10% DMSO	injury+ICP elevation	punctate
	72821	3	membrane disrupted	10% DMSO	injury+ICP elevation	punctate
	72821	3	membrane disrupted	10% DMSO	injury+ICP elevation	punctate
	72821	3	membrane disrupted	10% DMSO	injury+ICP elevation	punctate
	72821	3	membrane disrupted	10% DMSO	injury+ICP elevation	punctate
	72821	3	membrane disrupted	10% DMSO	injury+ICP elevation	punctate
	72821	3	membrane disrupted	10% DMSO	injury+ICP elevation	punctate
	72821	3	membrane disrupted	10% DMSO	injury+ICP elevation	punctate
	72821	3	membrane disrupted	10% DMSO	injury+ICP elevation	punctate
	72821	3	membrane disrupted	10% DMSO	injury+ICP elevation	punctate
	72821	4	non-disrupted	10% DMSO	injury+ICP elevation	punctate
	72821	4	non-disrupted	10% DMSO	injury+ICP elevation	punctate
	72821	4	non-disrupted	10% DMSO	injury+ICP elevation	punctate
	72821	4	non-disrupted	10% DMSO	injury+ICP elevation	punctate
	72821	4	non-disrupted	10% DMSO	injury+ICP elevation	punctate
	100121	5	membrane disrupted	10% DMSO	injury+ICP elevation	punctate
	100121	5	membrane disrupted	10% DMSO	injury+ICP elevation	punctate
	100121	5	membrane disrupted	10% DMSO	injury+ICP elevation	punctate
	100121	5	membrane disrupted	10% DMSO	injury+ICP elevation	punctate
	100121	5	membrane disrupted	10% DMSO	injury+ICP elevation	punctate
	100121	5	membrane disrupted	10% DMSO	injury+ICP elevation	punctate
	100121	5	membrane disrupted	10% DMSO	injury+ICP elevation	punctate
	100121	5	membrane disrupted	10% DMSO	injury+ICP elevation	diffuse
	100121	5	membrane disrupted	10% DMSO	injury+ICP elevation	diffuse
	100121	5	membrane disrupted	10% DMSO	injury+ICP elevation	diffuse
	100121	5	non-disrupted	10% DMSO	injury+ICP elevation	punctate
	100121	5	non-disrupted	10% DMSO	injury+ICP elevation	punctate
	100121	5	non-disrupted	10% DMSO	injury+ICP elevation	diffuse
	100121	5	non-disrupted	10% DMSO	injury+ICP elevation	diffuse
	100121	5	non-disrupted	10% DMSO	injury+ICP elevation	diffuse
	100121	5	non-disrupted	10% DMSO	injury+ICP elevation	diffuse
	100121	5	non-disrupted	10% DMSO	injury+ICP elevation	diffuse
	100121	5	non-disrupted	10% DMSO	injury+ICP elevation	diffuse
	100121	5	non-disrupted	10% DMSO	injury+ICP elevation	diffuse
	100121	5	non-disrupted	10% DMSO	injury+ICP elevation	diffuse
	100121	1	membrane disrupted	10% DMSO	injury+ICP elevation	punctate
	100121	1	membrane disrupted	10% DMSO	injury+ICP elevation	diffuse
	100121	1	membrane disrupted	10% DMSO	injury+ICP elevation	diffuse
	100121	1	membrane disrupted	10% DMSO	injury+ICP elevation	diffuse
	100121	1	membrane disrupted	10% DMSO	injury+ICP elevation	diffuse
	100121	1	membrane disrupted	10% DMSO	injury+ICP elevation	diffuse
	100121	1	membrane disrupted	10% DMSO	injury+ICP elevation	diffuse
	100121	1	membrane disrupted	10% DMSO	injury+ICP elevation	diffuse
	100121	1	membrane disrupted	10% DMSO	injury+ICP elevation	diffuse
	100121	1	membrane disrupted	10% DMSO	injury+ICP elevation	diffuse
	100121	1	non-disrupted	10% DMSO	injury+ICP elevation	punctate
	100121	1	non-disrupted	10% DMSO	injury+ICP elevation	punctate
	100121	1	non-disrupted	10% DMSO	injury+ICP elevation	diffuse
	100121	1	non-disrupted	10% DMSO	injury+ICP elevation	diffuse
	100121	1	non-disrupted	10% DMSO	injury+ICP elevation	diffuse
	100121	1	non-disrupted	10% DMSO	injury+ICP elevation	diffuse
	100121	1	non-disrupted	10% DMSO	injury+ICP elevation	diffuse
	100121	1	non-disrupted	10% DMSO	injury+ICP elevation	diffuse
	100121	1	non-disrupted	10% DMSO	injury+ICP elevation	diffuse
	100121	1	non-disrupted	10% DMSO	injury+ICP elevation	diffuse
	100121	2	membrane disrupted	10% DMSO	injury+ICP elevation	punctate
	100121	2	membrane disrupted	10% DMSO	injury+ICP elevation	punctate
	100121	2	membrane disrupted	10% DMSO	injury+ICP elevation	punctate
	100121	2	membrane disrupted	10% DMSO	injury+ICP elevation	punctate
	100121	2	membrane disrupted	10% DMSO	injury+ICP elevation	punctate
	100121	2	membrane disrupted	10% DMSO	injury+ICP elevation	punctate
	100121	2	membrane disrupted	10% DMSO	injury+ICP elevation	punctate
	100121	2	membrane disrupted	10% DMSO	injury+ICP elevation	diffuse
	100121	2	membrane disrupted	10% DMSO	injury+ICP elevation	diffuse
	100121	2	membrane disrupted	10% DMSO	injury+ICP elevation	diffuse
	100121	2	non-disrupted	10% DMSO	injury+ICP elevation	punctate
	100121	2	non-disrupted	10% DMSO	injury+ICP elevation	punctate
	100121	2	non-disrupted	10% DMSO	injury+ICP elevation	diffuse
	100121	2	non-disrupted	10% DMSO	injury+ICP elevation	diffuse
	100121	2	non-disrupted	10% DMSO	injury+ICP elevation	diffuse
	100121	2	non-disrupted	10% DMSO	injury+ICP elevation	diffuse
	100121	2	non-disrupted	10% DMSO	injury+ICP elevation	diffuse
	100121	2	non-disrupted	10% DMSO	injury+ICP elevation	diffuse
	100121	2	non-disrupted	10% DMSO	injury+ICP elevation	diffuse
	100121	2	non-disrupted	10% DMSO	injury+ICP elevation	diffuse
	100121	3	membrane disrupted	10% DMSO	injury+ICP elevation	punctate
	100121	3	membrane disrupted	10% DMSO	injury+ICP elevation	punctate
	100121	3	membrane disrupted	10% DMSO	injury+ICP elevation	punctate
	100121	3	membrane disrupted	10% DMSO	injury+ICP elevation	punctate
	100121	3	membrane disrupted	10% DMSO	injury+ICP elevation	punctate
	100121	3	membrane disrupted	10% DMSO	injury+ICP elevation	punctate
	100121	3	membrane disrupted	10% DMSO	injury+ICP elevation	punctate
	100121	3	membrane disrupted	10% DMSO	injury+ICP elevation	punctate
	100121	3	membrane disrupted	10% DMSO	injury+ICP elevation	diffuse
	100121	3	membrane disrupted	10% DMSO	injury+ICP elevation	diffuse
	100121	3	non-disrupted	10% DMSO	injury+ICP elevation	punctate
	100121	3	non-disrupted	10% DMSO	injury+ICP elevation	punctate
	100121	3	non-disrupted	10% DMSO	injury+ICP elevation	punctate
	100121	3	non-disrupted	10% DMSO	injury+ICP elevation	punctate
	100121	3	non-disrupted	10% DMSO	injury+ICP elevation	punctate
	100121	3	non-disrupted	10% DMSO	injury+ICP elevation	punctate
	100121	3	non-disrupted	10% DMSO	injury+ICP elevation	diffuse
	100121	3	non-disrupted	10% DMSO	injury+ICP elevation	diffuse
	100121	3	non-disrupted	10% DMSO	injury+ICP elevation	diffuse
	100121	3	non-disrupted	10% DMSO	injury+ICP elevation	diffuse
	100121	4	membrane disrupted	10% DMSO	injury+ICP elevation	punctate
	100121	4	membrane disrupted	10% DMSO	injury+ICP elevation	punctate
	100121	4	membrane disrupted	10% DMSO	injury+ICP elevation	punctate
	100121	4	membrane disrupted	10% DMSO	injury+ICP elevation	punctate
	100121	4	membrane disrupted	10% DMSO	injury+ICP elevation	punctate
	100121	4	membrane disrupted	10% DMSO	injury+ICP elevation	punctate
	100121	4	membrane disrupted	10% DMSO	injury+ICP elevation	diffuse
	100121	4	membrane disrupted	10% DMSO	injury+ICP elevation	diffuse
[truncated: 637 more rows]
