# Supplementary material for: The Effects of Cathepsin B Inhibition in the Face of Diffuse Traumatic Brain Injury and Secondary Intracranial Pressure Elevation
Source: Preprints.org preprint supplement (doi:10.20944/preprints202405.1740.v1), 2024-05-27
Supplement: Supplementary file 3 [file Sup Table 2.xlsx]

## Sheet: Sheet1
Supplemental Table 2. Full data set for all data presented in figures 1-9 and figure 11.
Animal ID	Injury intensity (atm)	Infusion	ICP elevation	Sample prepared for	Fig. 1: Cath B activity Left cortex (fold change)	Fig. 1: Cath B activity Right cortex (fold change)	Fig. 1: Cath B activity Liver (fold change)	Fig. 2: Left Both bands Cath B (% of naive expression)	Fig. 2: Left Upper band Cath B (% of naive expression)	Fig. 2: Left Lower band Cath B (% of naive expression)	Fig 3: Left both bands BCL-XL (% of naive expression)	Left Upper band BCL-XL (% of naive expression)	Left Lower band BCL-XL (% of naive expression)	Fig. 4: Left BAK (% of naive expression)	Fig. 5: Left Upper band AIF (% of naive expression)	Fig. 5: Left Lower band AIF (% of naive expression)	Fig. 7: Average total neurons/0.98mm2	Fig. 8: Percent membrane disrupted neurons/0.98mm2	Fig. 11: Pre-injury WNT score	Fig. 11: 2w Post-injury WNT score
21021	sham	DMSO	No	protein	3.353	3.777	6.429	210.32	251.03	276.47	95.11	103.04	91.92	188.79	86.65	93.73			2.67	7.67
72021	sham	DMSO	No	protein	4.098	5.852	13.592	174.37	188.71	153.48	68.72	68.83	65.19	122.07	121.56	113.19			4.33	4.33
91721	sham	DMSO	No	protein	4.615	5.354	8.026	102.55	96.36	112.75	160.65	165.01	150.5	103.71	98.07	95.84			2.67	6.33
21122	sham	DMSO	No	protein	4.071	4.198	8.107	185.63	174.65	202.72	80.93	85.02	83.47	418.91	134.04	120.21			3.67	3.67
40622	sham	DMSO	No	protein	4.863	4.308	7.286	210.91	228.65	166.54	81.77	87.28	83.23	304.49	129.49	111.81			2.67	3.33
71122	sham	DMSO	No	protein	3.261	4.727	6.552	203.66	211.65	194.88	62.72	66.33	67.96	236.57	125.54	108.24			5	5
31721	sham	DMSO	No	Histo													231.893	10.0416	1	2.67
051721B	sham	DMSO	No	Histo													211.885	13.7654	1	3.67
93021	sham	DMSO	No	Histo													280.633	13.3745	5	10.67
21822	sham	DMSO	No	Histo													210.4	2.42395	3	5
41722	sham	DMSO	No	Histo													228.933	5.35818	5.67	5.33
72222	sham	DMSO	No	Histo													249.867	2.02775	3.33	4.33
20921	sham	CA-074Me	No	protein	0.629	4.234	4.299	503.54	561.84	714.07	96.54	95.36	93.79	189.59	102.41	104.48			4	2.33
72721	sham	CA-074Me	No	protein	0.342	1.541	5.822	445.75	379.21	569.64	93.11	86.94	87.57	102.97	124.74	120.91			3.33	7.33
92221	sham	CA-074Me	No	protein	1.384	2.936	8.439	106	97.65	121.45	133.46	151.32	122.84	111.29	102.27	88.66			4.67	1.67
20922	sham	CA-074Me	No	protein	1.415	3.083	10.011	156.8	154.96	157.68	69.07	65.24	81.86	231.56	97.02	108.9			3	2.67
41422	sham	CA-074Me	No	protein	1.731	2.648	6.252	295.63	279.44	329.71	138.4	137.44	144.51	487.98	103.7	97.52			4	4.33
71522	sham	CA-074Me	No	protein	4.468	4.309	6.774	113.36	93.57	127.85	82.46	81.45	86	293.65	139.18	85.57			3.67	3.33
91622	sham	CA-074Me	No	protein															6.33	1.67
51021	sham	CA-074Me	No	Histo													164.267	27.3151	0	2
80221	sham	CA-074Me	No	Histo													225.053	8.48286	3	7.33
100821	sham	CA-074Me	No	Histo													185.633	20.2011	2.67	4.33
22122	sham	CA-074Me	No	Histo													276.485	5.14029	1	4.67
41522	sham	CA-074Me	No	Histo													245.914	8.79936	5	5
72322	sham	CA-074Me	No	Histo													244.867	2.61367	4	8
20821	1.93	DMSO	No	protein	7.194	2.143	5.14	168.13	222.8	195.2	65.8	70.85	64.08	224.63	92.58	79.2			3.67	6
73021	2.03	DMSO	No	protein	6.823	5.925	5.42	192.46	192.26	191.69	85.82	85.42	81.54	95.99	142.11	107.92			2.33	6.67
92121	2.1	DMSO	No	protein	5.542	4.855	8.376	98.48	92.6	104.01	111.92	117.1	105.54	122.98	91.25	73.54			5	7.33
40422	2.08	DMSO	No	protein	5.661	5.545	9.522	154.5	166.19	132.65	88.29	88.95	89.52	308.3	120.26	94.52			3.33	6.33
41322	2.06	DMSO	No	protein	5.743	4.597	5.814	330.79	307.52	371.01	78.26	85.15	75.22	441.06	115.43	104.04			4.67	4
071622A	2.05	DMSO	No	protein	3.895	3.792	6.612	250.16	235.24	269.71	88.43	84.11	88.03	252.97	139.05	91.61			6	8.67
31121	2.05	DMSO	No	Histo													291.767	8.83126	9.33	3.33
51321	2.14	DMSO	No	Histo													207.269	6.28867	1.67	3.33
100421	2.05	DMSO	No	Histo													256.226	10.6807	6	9.67
22322	1.96	DMSO	No	Histo													214.2	3.09679	3.67	6.67
41922	2.01	DMSO	No	Histo													221.394	5.78976	2	8.67
72022	2.03	DMSO	No	Histo													259.852	4.67299	7.33	13.6667
20321	2.1	CA-074Me	No	protein	1.964	3.128	2.979	129.34	149.58	197.11	76.31	74.71	75.83	164.08	97.33	81.52			3.67	5.67
72921	1.93	CA-074Me	No	protein	2.336	5.25	8.026	314.57	250.42	475.59	93.4	97.02	86.06	97.5	126.69	139.41			1.67	6
80521	2	CA-074Me	No	protein	0.254	2.14	7.351												5	8.66
91621	2.1	CA-074Me	No	protein	4.346	4.967	9.57	75.07	61.4	99.25	156.93	154.44	153.37	140.82	112.57	103.14			5.67	4.67
20822	2.2	CA-074Me	No	protein	3.611	4.497	7.287	376.64	311.13	510.36	57.91	63.77	56.39	421.72	111.93	81.88			6.67	7
40722	2.07	CA-074Me	No	protein	1.827	3.482	7.549	268.25	268.2	295.96	114.94	118.09	111.9	323.07	122.49	114.53			1.33	6
071622B	1.99	CA-074Me	No	protein	2.516	4.025	5.347	113.36	93.57	127.85	87.16	79.37	85.28	223	129.4	104.14			4	5.67
52121	2.18	CA-074Me	No	Histo													178.167	12.0674	3	6.67
80321	2.08	CA-074Me	No	Histo													254.571	12.6243	6	10.67
100621	2.07	CA-074Me	No	Histo													182.167	23.0009	5	5
22422	1.99	CA-074Me	No	Histo													278.71	11.5856	4.33	9
42222	2.15	CA-074Me	No	Histo													265.281	4.6413	6	6.67
71922	1.99	CA-074Me	No	Histo													227.875	1.22874	4.33	9
91522	2.05	CA-074Me	No	Histo															4.33	5.67
22321	2.1	DMSO	20mmHg	protein	3.144	3.117	3.241	185.41	259.09	196.56	106.44	103.88	103.17	179.19	116.56	101.3			3	9.67
70821	2.03	DMSO	20mmHg	protein	5.397	5.578	6.855	137.9	156.02	116.35	75.88	65.84	78.44	98.33	135.01	120.46			3.33333	7.67
92721	2.07	DMSO	20mmHg	protein	5.456	6.289	10.075	123.46	113.68	132.73	159.66	189.5	143.57	131.68	104.31	102.84			6	14
21622	2.03	DMSO	20mmHg	protein	4.83	4.848	7.723	143.15	148.53	132.74	103.28	120.09	103	404.48	105.86	105.4			2.67	7.33
41122	2.01	DMSO	20mmHg	protein	8.634	1.874	5.064	305.62	288.51	351.24	60.82	68.22	57.42	281.12	112.57	98.36			4	11
71222	2.2	DMSO	20mmHg	protein	4.684	3.988	3.228	222.2	245.55	181.31	88.07	101.88	87.65	255.26	106.21	88.52			4.33	9.67
72122	2.05	DMSO	20mmHg	Histo															4	7.67
30421	1.91	DMSO	20mmHg	Histo													263.194	6.90036		4.33
051721A	1.91	DMSO	20mmHg	Histo													263.1	16.0142	2	8.33
72821	2.05	DMSO	20mmHg	Histo													193.312	6.65589	5.67	13.67
100121	2.21	DMSO	20mmHg	Histo													213.929	11.1519	4	11
22222	2.1	DMSO	20mmHg	Histo													291.552	20.2011	2.67	8
41822	2.21	DMSO	20mmHg	Histo													266.548	3.42339		6.67
20421	2.15	CA-074Me	20mmHg	protein	1.889	3.596	4.122	295.17	365.69	438.79	93.44	84.48	88.68	183.12	93.48	74.05			1.67
72321	2.08	CA-074Me	20mmHg	protein	2.822	3.73	6.471	171.28	154	208.12	86.32	82.17	81.14	114.11	124.93	108.69			2.67	5.67
92021	2.13	CA-074Me	20mmHg	protein	2.343	3.758	6.648	89.56	81.41	102.56	140.21	138.39	132.14	143.56	113.84	85.02			7.33	5
21522	2.03	CA-074Me	20mmHg	protein	3.528	3.601	5.33	267	179.66	421.61	67.23	81.59	61.95	350.62	100.4	88.95			2.33	6.33
41222	2.02	CA-074Me	20mmHg	protein	0.195	5.421	4.137	525.66	426.15	725.43	142.03	165.4	146.07	499.63	136.78	111.94			4.33	3.67
71322	2.05	CA-074Me	20mmHg	protein	2.215	0.248	6.51	206.86	235.25	164.29	86.5	97.28	84.96	255.77	101.51	81.14			3.33	4.33
51121	2.15	CA-074Me	20mmHg	Histo													196.679	9.13383	0.5	4.33
80421	2.03	CA-074Me	20mmHg	Histo													305.367	8.87458	2.67	8.33
100721	2.08	CA-074Me	20mmHg	Histo													193.233	9.49629	2.33	6
40522	1.94	CA-074Me	20mmHg	Histo													271.829	2.97456	5.33	6.33
42122	2.05	CA-074Me	20mmHg	Histo													254.97	3.37533	5.67	12
42522	2.05	CA-074Me	20mmHg	Histo													248.382	4.16815	4.67	7.67
